1 **Inhibitor screening of Spike variants reveals the heterogeneity**  
2 **of neutralizing antibodies to COVID-19 infection and**  
3 **vaccination**

4 Xiaomei Zhang<sup>1,8</sup>, Mei Zheng<sup>2,3,5,8</sup>, Te Liang<sup>1,8</sup>, Haijian Zhou<sup>4,5,8</sup>, Hongye  
5 Wang<sup>1</sup>, Jiahui Zhang<sup>1</sup>, Jing Ren<sup>1</sup>, Huoying Peng<sup>1</sup>, Siping Li<sup>1</sup>, Haodong Bian<sup>1</sup>,  
6 Chundi Wei<sup>1</sup>, Shangqi Yin<sup>2,3,5</sup>, Chaonan He<sup>2,3,5</sup>, Ying Han<sup>2,3,5</sup>, Minghui Li<sup>4,5</sup>,  
7 Xuexin Hou<sup>4,5</sup>, Jie Zhang<sup>6</sup>, Liangzhi Xie<sup>6</sup>, Jing Lv<sup>7</sup>, Biao Kan<sup>4,5,9</sup>, Yajie  
8 Wang<sup>2,3,5,9</sup>, Xiaobo Yu<sup>1,9</sup>

9

10 **Affiliations**

11 <sup>1</sup> State Key Laboratory of Proteomics, Beijing Proteome Research Center,  
12 National Center for Protein Sciences-Beijing (PHOENIX Center), Beijing  
13 Institute of Lifeomics, Beijing, 102206, China.

14 <sup>2</sup> Department of Clinical Laboratory, Beijing Ditan Hospital, Capital Medical  
15 University, Beijing, China.

16 <sup>3</sup> Department of Research Ward, Beijing Ditan Hospital, Capital Medical  
17 University, Beijing, China.

18 <sup>4</sup> State Key Laboratory of Infectious Disease Prevention and Control, National  
19 Institute for Communicable Disease Control and Prevention, Chinese Center  
20 for Disease Control and Prevention, Beijing, 102206, China

21 <sup>5</sup> Joint Laboratory for Pathogen Identification of ICDC and Ditan Hospital,  
22 Beijing, 102206, China

23 <sup>6</sup> Beijing Key Laboratory of Monoclonal Antibody Research and Development,

24 Sino Biological, Inc., Beijing, 100176, China

25 <sup>7</sup> Gobond Testing Technology (Beijing) Co., Ltd., Beijing, 102629, China.

26

27 <sup>8</sup> These authors contributed equally to this work.

28 <sup>9</sup> Correspondence: xiaobo.yu@hotmail.com (X. Y.), wangyajie@ccmu.edu.cn

29 (Y. W.), kanbiao@icdc.cn (B. K.)

30

## 31 **Highlights**

- 32 ● Developed a high throughput assay to screen the neutralizing effect of
- 33 antibodies across multiple SARS-CoV-2 Spike variants simultaneously.
- 34 ● Characterized the heterogeneity of neutralizing antibodies produced in
- 35 response to COVID-19 infection and vaccination.
- 36 ● Demonstrated the capacity of Spike variants neutralization is associated
- 37 with the diversity of anti-Spike antibodies.

38

## 39 **Abstract**

40 Mutations of the coronavirus responsible for coronavirus disease 2019  
41 (COVID-19) could impede drug development and reduce the efficacy of  
42 COVID-19 vaccines. Here, we developed a multiplexed Spike-ACE2 Inhibitor  
43 Screening (mSAIS) assay that can measure the neutralizing effect of  
44 antibodies across numerous variants of the coronavirus's Spike (S) protein

45 simultaneously. By screening purified antibodies and serum from convalescent  
46 COVID-19 patients and vaccinees against 72 S variants with the mSAIS assay,  
47 we identified new S mutations that are sensitive and resistant to neutralization.  
48 Serum from both infected and vaccinated groups with a high titer of  
49 neutralizing antibodies (NAbs) displayed a broader capacity to neutralize S  
50 variants than serum with low titer NAbs. These data were validated using  
51 serum from a large vaccinated cohort (n=104) with a tiled S peptide microarray.  
52 In addition, similar results were obtained using a SARS-CoV-2 pseudovirus  
53 neutralization assay specific for wild-type S and four prevalent S variants  
54 (D614G, B.1.1.7, B.1.351, P.1), thus demonstrating that high antibody diversity  
55 is associated with high NAb titers. Our results demonstrate the utility of the  
56 mSAIS platform in screening NAbs. Moreover, we show that heterogeneous  
57 antibody populations provide a more protective effect against S variants, which  
58 may help direct COVID-19 vaccine and drug development.

59

## 60 **Keywords**

61 SARS-CoV-2, COVID-19, microarray, neutralizing antibody, mutation, Spike

62

## 63 **Introduction**

64 Coronavirus disease 2019 (COVID-19) is caused by the severe respiratory  
65 coronavirus 2 (SARS-CoV-2). As of May 2021, SARS-CoV-2 had infected 162  
66 million people and caused over three million deaths worldwide (Dong et al.,

67 2020). A key step in infection is viral entry, which is facilitated by the interaction  
68 between the SARS-CoV-2 Spike (S) protein via its receptor binding domain  
69 (RBD) (319 – 541 aa) with the human Angiotensin-Converting Enzyme 2  
70 (ACE2) receptor. Thus, this interaction is a major focus in drug and vaccine  
71 development efforts (Burki, 2021; Dai and Gao, 2021). For example, the  
72 current COVID-19 vaccines approved by the U.S. Food and Drug  
73 Administration (FDA) stimulate the immune response to generate antibodies  
74 capable of neutralizing the Spike-ACE2 interaction. Unfortunately,  
75 SARS-CoV-2 is mutating, with new variants emerging nearly every week that  
76 could impede drug development and reduce the efficacy of COVID-19  
77 vaccines (Dai and Gao, 2021; Kemp et al., 2021).

78 Mutations in the S protein are of particular concern since they could  
79 enable SARS-CoV-2 to evade defense mechanisms that are elicited by  
80 COVID-19 vaccines and therapeutic antibodies (Aschwanden, 2021; Del Rio  
81 and Malani, 2021). For example, the D614G variant, which was first identified  
82 in July 2020, has a faster infection rate and higher viral load in the upper  
83 respiratory tract than the wild-type “Wuhan-Hu-1” strain (Hou et al., 2020b;  
84 Korber et al., 2020). It has since become one the most prevalent strains. The  
85 B.1.1.7 variant (D614G, N501Y) is more infectious and may lead to increased  
86 mortality compared to the parental strain (Davies et al., 2021; Galloway et al.,  
87 2021). The B.1.351 and P.1 variants contain three RBD mutations at E484K,  
88 N501Y, and K417N or K417T, respectively. These mutations have shown

89 resistance to neutralizing antibodies (NAbs) produced by convalescent  
90 COVID-19 patients and vaccinees that inhibit the wild-type Spike-ACE2  
91 interaction (Garcia-Beltran et al., 2021; Liu et al., 2021; Madhi et al., 2021;  
92 Wang et al., 2021a; Wang et al., 2021b; Wibmer et al., 2021). The vaccinees in  
93 these studies received the most popular vaccines worldwide, including  
94 mRNA-based COVID-19 vaccines (Moderna and Pfizer BioNTech) and a  
95 replication-deficient chimpanzee adenoviral vector COVID-19 vaccine  
96 (AstraZeneca). Similar results were obtained when testing a B.1.1.7 variant  
97 with an additional E484K mutation (Collier et al., 2021; Wang et al., 2021b).  
98 These studies highlight the importance of an assay that can measure the  
99 humoral response to S variants in developing effective therapeutic antibodies  
100 and vaccines for COVID-19 (Burki, 2021; Priesemann et al., 2021).

101 To address this urgent need, we developed a protein microarray for the  
102 high throughput, multiplexed detection of NAbs to SARS-CoV-2 S variants.  
103 This multiplexed Spike-ACE2 Inhibitor Screening (mSAIS) assay is simple to  
104 use, able to detect NAbs to numerous S variants simultaneously, requires  
105 minimal sample volume (i.e., 20  $\mu$ L serum), and can be performed with  
106 common laboratory equipment. It could also be used with other potential  
107 neutralizing molecules (e.g., small molecules). To demonstrate the potential of  
108 the mSAIS assay, we assessed the neutralization potential of purified anti-S  
109 antibodies and serum from convalescent COVID-19 patients and vaccinees  
110 across 72 S variants. The sensitivity and resistance of the various S protein

111 mutations to the NAb were determined, and new escape mutations that are  
112 not targeted by vaccine-induced antibodies were identified. The neutralization  
113 capacity of high and low titer NAb titer samples was also compared. Our  
114 results were validated using a peptide-based microarray and SARS-CoV-2  
115 pseudovirus neutralization assay.

116

## 117 **Results**

### 118 **Development of the mSAIS assay.**

119 The mSAIS assay enables the simultaneous screening of various potential  
120 neutralizing molecules across numerous SARS-CoV-2 S variants within 2  
121 hours ([Figure 1A](#)). Here, 72 S protein variants with a polyhistidine tag at the  
122 C-terminus were expressed in the human embryonic kidney 293 (HEK293) cell  
123 line ([Figure S1](#)), purified, and printed onto a chemically-modified glass slide as  
124 previously described (Wang et al., 2020; Zhang et al., 2020b). The printed S  
125 protein variants were selected from the COVID-19 virus mutation tracker  
126 database ([Figure S2](#)) and literature, and included 2 variants with mutations in  
127 the S protein's subunit 1 (S1) and subunit 2 (S2) domains, 7 variants with  
128 mutations in S1, and 63 variants with mutations in the RBD (Alam et al., 2021).  
129 Prevalent SARS-CoV-2 strains, such as the D614G, B.1.1.7, and B.1.351  
130 strains, were among the variants printed. In addition, two negative controls and  
131 one positive control (SARS-CoV-2 wild-type RBD) were printed on the array  
132 ([Figure S3](#)). The negative controls included on the array were the

133 SARS-CoV-2 Nucleocapsid (N) protein and the RBD of the Middle East  
134 respiratory syndrome coronavirus 2 (MERS-CoV-2). Following printing, the  
135 sample (e.g., NAb) and a Cy5-labeled extracellular domain of ACE2 were  
136 sequentially incubated on the array with alternated wash steps to remove  
137 unbound sample and ACE2. Thus, S-ACE2 complex formation resulted in  
138 fluorescence whereas neutralizing samples decreased fluorescence.

139 Before using the mSAIS assay to screen samples, the reproducibility of the  
140 array and the binding of the S variants with ACE2 in the presence and absence  
141 of NABs were evaluated. The results show that the intra- and inter-array  $r$   
142 correlations for each step of the assay were 0.99 and 0.98, respectively  
143 (Figure S4, Figure 1B and 1C). Furthermore, the neutralizing capacity of 13  
144 serum samples from vaccinees determined by the mSAIS assay was  
145 compared to the data obtained using the live SARS-CoV-2. The  $r$  correlation  
146 between the two approaches was 0.82 (Figure S5), demonstrating that the  
147 mSAIS assay has high reproducibility and is a feasible approach for screening  
148 potential neutralizing molecules. It is also important to note that working with  
149 live SARS-CoV-2 requires biosafety level 3 (BSL3) facilities whereas the  
150 mSAIS assay can be performed safely at BSL1 or BSL2 depending on the  
151 nature of the tested samples.

152

153 **Characterizing ACE2 interactions with Spike variants with the mSAIS**  
154 **assay**

155 By testing different amounts of purified antibodies or serum, the half maximal  
156 inhibitory concentration (IC<sub>50</sub>) or effective concentration (EC<sub>50</sub>) can be  
157 determined, respectively, and the results visualized via fluorescence. When  
158 the concentration of ACE2 applied to the assay was low ( $\leq 2.5$   $\mu\text{g/mL}$ ), the  
159 fluorescent signal across the different S variants varied, thus indicating that the  
160 binding affinities of ACE2 to the S variants are not the same (Figure 2A).  
161 Indeed, the calculation of the EC<sub>50</sub> for the S variants with mutations between  
162 residues 234 - 614 shows that the binding affinity (EC<sub>50</sub>) ranges from 0.65 to  
163 17.25  $\mu\text{g/mL}$ . ACE2 had the lowest binding affinity to two S variants, F465E  
164 and N487R, with an EC<sub>50</sub> of 16.16 and 17.25  $\mu\text{g/mL}$ , respectively (Figure 2B).

165 The EC<sub>50</sub> ratios between the wild-type and variant S proteins were  
166 calculated and log<sub>2</sub> transformed (Figure 2C). Using a 2-fold minimum as the  
167 selection criteria, 10 mutations that weaken the S-ACE2 interaction were  
168 identified, including A372T, F377L, G446V, F456E, G485S, F486S, N487R,  
169 F490L, P499R and Y505C (Figure 2C and 2D). Notably, the S variant D614G  
170 did not appear to affect ACE2 binding, which agrees with a previous study  
171 using surface plasmon resonance (Zhang et al., 2020a).

172 Interestingly, 8/10 (80%) mutations that decreased the ability of the S  
173 protein to bind ACE2 (G446V, F456E, G485S, F486S, N487R, F490L, P499R,  
174 Y505C) are located at the RBD-ACE2 interaction interface (Figure 2E).  
175 Moreover, F456E and N487R had the weakest ACE2 binding affinities. These  
176 results further support the importance of the RBD domain in antibody



177 neutralization (Barnes et al., 2020; Dai and Gao, 2021; Tan et al., 2020).

178

### 179 **Heterogeneous reaction of antibodies to Spike variants**

180 Three antibodies that bind to the S protein's RBD (Figure S6) were tested with  
181 the mSAIS assay, including a mouse monoclonal antibody #73, a rabbit  
182 polyclonal antibody #21, and a rabbit monoclonal antibody #53 (Figure 3). The  
183 IC<sub>50</sub> of antibodies #21 and #53 to the S variants range from 42.04 – 10,000  
184 ng/mL and 0.00063 – 10,000 ng/mL, respectively (Figure 3B and 3C). However,  
185 antibody #73 did not inhibit the RBD-ACE2 interaction (Figure 3A), indicating  
186 that not all anti-RBD antibodies have neutralizing activity.

187 Antibody #21 was unable to neutralize the formation of the S-ACE2  
188 complex for 8 “resistant” S variants: R408I, HV69-70 deletion/N501Y/D614G  
189 (B.1.1.7 strain), G446V, F456E, N487R, F490L, Y505C, and  
190 K417N/E484K/N501Y (B.1.351 strain) (Figure 3B). Two other studies also  
191 observed similar results for the B.1.351 strain (Li et al., 2021; Wang et al.,  
192 2021a). Using a two-fold difference in signal compared to the wild-type S  
193 protein as the criteria, 33 variants showed resistance to neutralization with  
194 antibody #21 (Figure 3D). Seventeen of the 33 (51.5%) mutations are located  
195 between residues 437 and 508, which is the region of the RBD that physically  
196 interacts with ACE2 (Singh et al., 2021) (Figure 3D and 3F, Figure S7A). Four  
197 of the ten (40%) sensitive mutations are also located within the RBD interface  
198 (Figure 3D and 3F, Figure S7A).

199 Antibody #53 had 13 escape mutations of varying resistance, with 5  
200 mutations (F456E, F486S, N487R, N501Y, Y505C) showing complete  
201 resistance to neutralizing activity (Figure 3C and 3E). Seven (53.85%)  
202 mutations are located within the interface of the RBD-ACE2 interaction (Figure  
203 3E and 3G, Figure S7B). Interestingly, six (46.15%) sensitive mutations are not  
204 located within the RBD-ACE2 interface (Figure 3E and 3G, Figure S7B), which  
205 indicates that binding to non-RBD binding epitopes can also have  
206 neutralization effects (Li et al., 2020; Prevost and Finzi, 2021).

207

#### 208 **Heterogeneous reaction of serological NAbs to S variants in** 209 **convalescent COVID-19 patients**

210 We next screened the serum from 25 COVID-19 patients who had recovered  
211 from SARS-CoV-2 infection. Using hierarchical cluster analysis, the  
212 convalescent patients clustered into three groups based on their NAb titers:  
213 high, low, and mixed (Figure 4A and 4B). After determining the percentage of  
214 escape mutations under three different EC50 thresholds (10, 30, 50), it was  
215 observed that the number of escape mutations were fewer for the high-titer  
216 NAb group than the low-titer NAb group (Figure 4C).

217 Next, the NAbs to wild-type and mutant S proteins were compared (Figure  
218 4D). The D614G variant did not lead to a change of NAbs to S1 and S1+S2  
219 proteins (Figure 4E, Figure S8). Using statistical analysis, the number of NAbs  
220 to eight mutated proteins was significantly decreased, including 4 known

221 escape mutations [K417N, G446V, F490L, K417N/E484K/N501Y (B.1.351  
222 strain)] and 4 newly identified escape mutations (A372S, F456E, N487R,  
223 Y505C) (Figure 4F and 4G) (Chen et al., 2021; Li et al., 2021; Li et al., 2020;  
224 Zhou et al., 2021). Notably, structural analyses show that 5 escape mutations  
225 (K417N/E484K/N501Y, G446V, F456E, N487R, F490L) are located within the  
226 interface of RBD-ACE2 interaction, thus indicating that this RBD subdomain is  
227 important in neutralizing SARS-CoV-2 infection (Wang et al., 2020). All these  
228 results demonstrate the heterogeneous reactivity of NAbs produced by  
229 COVID-19 patients across S variants.

230

### 231 **Heterogeneous reactivity of NAbs produced by vaccinees to S variants**

232 The mSAIS assay was next used to measure the neutralizing effect of  
233 antibodies produced by 30 vaccinees who received the inactivated vaccine in  
234 China (Wu et al., 2021). NAbs were generated to the majority of S variants  
235 (Figure 5A). Using hierarchical cluster analysis, the vaccinees consistently  
236 clustered into two groups based on the level of their NAb titer: low and high  
237 (Figure 5A and 5B). Using three EC50 thresholds (10, 20, 30), high-titer NAb  
238 group had a lower number of escape mutations compared to low-titer NAb  
239 group (Figure 5C).

240 Next, the NAb titers of vaccinees across all S variants were ascertained  
241 (Figure 5D). Like the convalescent COVID-19 patients, the D614G variant did  
242 not alter the neutralizing effect of the NAbs compared to wild-type S1+S2, S2,

243 and RBD (Figure 5E, Figure S9). Using statistical analysis, four escape  
244 mutations were identified, including 2 known (N501Y, K417N/E484K/N501Y)  
245 and 2 new (K378N, P499R) mutations (Figure 5F and 5G) (Chen et al., 2021).

246 To validate the results obtained with the mSAIS assay, we analyzed the  
247 NAbS with a SARS-CoV-2 pseudovirus neutralization assay displaying  
248 wild-type and mutant S (wild-type, D614G, B.1.1.7, B.1.351, P.1). The results  
249 for the D614G, B.1.1.7, B.1.351 variants aligned with the data obtained with  
250 the mSAIS assay (Figure 5H). The vaccinees also separated into high- and  
251 low-titer NAb groups (Figure 5I), further supporting the data obtained with the  
252 mSAIS assay (Figure 5C).

253

### 254 **High titer of NAbS contain anti-Spike antibodies with diverse binding** 255 **epitopes**

256 Two recent studies with rhesus macaques have shown that a high titer of NAbS  
257 produced in response to vaccination (DNA-based or adenovirus serotype 26  
258 (Ad26) vector-based) provided good protection against infection when  
259 challenged with SARS-CoV-2 (Mercado et al., 2020; Yu et al., 2020). In  
260 another study, NAb titers were significantly higher in vaccinees who had  
261 COVID-19 previously than vaccinees who never had COVID-19. Moreover, the  
262 vaccinees who had been infected with SARS-CoV-2 possessed NAbS that  
263 were able to neutralize all prevalent S variants (Stamatatos et al., 2021).

264 In order to provide insight into how well the high-titer NAb samples could  
265 protect against SARS-CoV-2 variants, we analyzed the differential expression  
266 of anti-S antibodies in the vaccinees. The level of antibodies that target the S  
267 protein's S1, S2 extracellular domain (ECD), and RBD is higher in the high-titer  
268 NAb group than the low-titer NAb group. Of these three antibodies, the  
269 differing level of anti-RBD antibodies across the two groups was the most  
270 pronounced ([Figure 6A](#)).

271 Next, we performed epitope mapping of the vaccinees' serological anti-S  
272 antibodies using a tiled peptide microarray representing the full-length S  
273 protein as previously described (Liang et al., 2021; Wang et al., 2020). Indeed,  
274 the results indicate that the high-titer NAb group bound to more diverse  
275 epitopes than the low-titer NAb group ([Figure 6B](#)). The number of  
276 immunogenic peptides within the S1, S2ECD, and RBD is also consistently  
277 higher in the high-titer NAb group ([Figure 6C](#)).

278 To further validate our findings, sera from the 104 vaccinees were  
279 analyzed using a SARS-CoV-2 pseudovirus neutralization assay. Prior to data  
280 analysis, all vaccinees were separated into three groups according to their  
281 NAb titers (<10, 10-50, >50). Notably, the results show that the concentration  
282 of anti-S antibodies is proportional to the concentration of NAb. However,  
283 there was no difference in the levels of anti-S1 antibodies that target the  
284 N-terminus or C-terminus across the vaccinees. The levels of anti-S2 ECD  
285 antibodies were significantly different only between NAb titers of <10 and >50

286 (Figure 7A). These results demonstrate that the antibodies produced in  
287 response to vaccination of inactivated vaccine primarily target the RBD (Figure  
288 6A and 7A).

289 The peptide microarray was also employed to examine serological NAb  
290 with a larger vaccinated cohort (n=104). The data confirm that the anti-S  
291 antibodies in the high-titer NAb group bind to more peptides representing the  
292 S1, S1 N-terminal domain, RBD, and S2 ECD of the S protein than the low-titer  
293 NAb group (Figure 7B, 7C). These data indicate that high NAb titers contain  
294 anti-S antibodies with increased binding diversity.

295

## 296 Discussion

297 The SARS-CoV-2 virus has mutated over time, resulting in circulating viral  
298 strains with altered transmission efficiencies, mortality rates, and S variants  
299 that can escape from the neutralizing effect of antibodies (Alam et al., 2021)  
300 (Davies et al., 2021; Hou et al., 2020b; Prevost and Finzi, 2021). Therefore,  
301 significant effort has been devoted to improve the diagnosis, prevention, and  
302 treatment of COVID-19 patients infected with SARS-CoV-2 variants (Abdool  
303 Karim and de Oliveira, 2021).

304 In this work, we developed an mSAIS assay that enables the detection of  
305 NAbS to numerous S variants simultaneously and rapidly. It has numerous  
306 advantages compared to the enzyme-linked immunosorbent assay (ELISA)  
307 and pseudovirus neutralization assays (Li et al., 2021; Tan et al., 2020;

308 Weisblum et al., 2020). First, our flexible platform can be easily adapted to  
309 include new S variants as they emerge. Second, only a laser scanner capable  
310 of detecting Cy5 is required to perform the mSAIS assay. Third, the  
311 multiplexed nature of the platform significantly reduces the sample volume,  
312 reagents, time, and cost to obtain data compared to single-plexed assays (Xu  
313 et al., 2020). For example, only 20  $\mu$ L of serum was needed to screen for NAb  
314 against 72 S variants in this study. In comparison, the volume requirements for  
315 ELISA or the pseudovirus neutralization assay would be 1,440 (72 $\times$ ) or 3,240  
316 (162 $\times$ )  $\mu$ L, respectively.

317 Using the mSAIS assay, we compared purified mouse and rabbit  
318 antibodies. Of the three antibodies tested, antibody #53 was able to inhibit the  
319 S-ACE2 interaction across the most S variants, thus it is a superior candidate  
320 for COVID-19 therapy. The comprehensive mapping of antibodies to different  
321 S variants would be valuable in understanding the sensitivity of mutations to  
322 antibody neutralization, and help develop antibody cocktails for COVID-19  
323 therapy (Li et al., 2021; Li et al., 2020; Prevost and Finzi, 2021; Starr et al.,  
324 2021).

325 Using serum from convalescent COVID-19 patients and vaccinees with  
326 the mSAIS assay, we identified 4 and 2 new resistant mutations, respectively,  
327 that escape NAb recognition (Figures 4 and 5). We also show that there are  
328 fewer escape mutations in high NAb titers than low titers, and this was  
329 observed in both convalescent COVID-19 patients and vaccinees (Figures 4C

330 and 5C). Using a large cohort of 104 vaccinees with multiple assays (i.e.,  
331 mSAIS assay, peptide array, pseudovirus neutralization assay), we further  
332 demonstrate that high titer NAbS contain anti-S antibodies that target more  
333 diverse binding epitopes, thus leading to more neutralizing capacity across a  
334 breadth of S variants (Figure 6 and 7). The production of heterogeneous  
335 antibodies could be due to the somatic mutations that occur during antibody  
336 maturation (Muecksch et al., 2021). Finally, our data suggest that an effective  
337 COVID-19 vaccination strategy to defend against the mutating SARS-CoV-2 is  
338 to elicit the immune response to produce high-titer NAbS that contain a large  
339 diversity of anti-S antibodies (Stamatatos et al., 2021; Starr. et al., 2021).  
340 However, the association between NAb titer and its ability to protect against  
341 SARS-CoV-2 infection in humans is unclear (Jin et al., 2021).

342 There were several limitations in this study. First, the mSAIS assay is *in*  
343 *vitro*, which might not accurately reflect results *in vivo*. Second, some  
344 conformational and glycosylation epitopes might not be detected using the  
345 peptide microarray that employed chemically-synthesized peptides (Wang et  
346 al., 2020). Finally, the number of serum samples from convalescent COVID-19  
347 patients and vaccinees were limited. The results obtained in this study should  
348 be validated in a large different cohort in the future.

349

## 350 **Conclusion**

351 Altogether, we developed a high-throughput microarray-based mSAIS assay,



352 which enables the multiplexed and rapid screening of NAbS to SARS-CoV-2 S  
353 variants. Using the mSAIS assay, we confirmed the neutralization capabilities  
354 of NAbS to known mutations, identified a number of new mutations that are  
355 resistant to the NAbS, and showed that there were fewer escape mutations  
356 with high NAb titers than low NAb titers in both convalescent COVID-19  
357 patients and vaccinees. The data demonstrate the great potential of our  
358 proteomics platform in mapping the ability of NAbS to block the interaction  
359 between SARS-CoV-2 S variants and ACE2 interactions. Although we tested  
360 purified antibodies and serum in this study, the mSAIS assay could be used  
361 with other sample types as well. Data gleaned from the mSAIS will help  
362 develop more effective vaccines and therapeutic antibodies to fight against  
363 COVID-19.

364

## 365 **References**

- 366 Abdool Karim, S.S., and de Oliveira, T. (2021). New SARS-CoV-2 Variants - Clinical, Public Health,  
367 and Vaccine Implications. *N Engl J Med* 384,1866-1868.
- 368 Alam, I., Radovanovic, A., Incitti, R., Kamau, A.A., Alarawi, M., Azhar, E.I., and Gojobori, T. (2021).  
369 CovMT: an interactive SARS-CoV-2 mutation tracker, with a focus on critical variants. *Lancet Infect Dis*  
370 21,602.
- 371 Aschwanden, C. (2021). Five reasons why COVID herd immunity is probably impossible. *Nature* 591,  
372 520-522.
- 373 Barnes, C.O., Jette, C.A., Abernathy, M.E., Dam, K.A., Esswein, S.R., Gristick, H.B., Malyutin, A.G., Sharaf,  
374 N.G., Huey-Tubman, K.E., Lee, Y.E., *et al.* (2020). SARS-CoV-2 neutralizing antibody structures inform  
375 therapeutic strategies. *Nature* 588, 682-687.
- 376 Burki, T. (2021). Understanding variants of SARS-CoV-2. *Lancet* 397, 462.
- 377 Chen, R.E., Zhang, X., Case, J.B., Winkler, E.S., Liu, Y., VanBlargan, L.A., Liu, J., Errico, J.M., Xie, X.,  
378 Suryadevara, N., *et al.* (2021). Resistance of SARS-CoV-2 variants to neutralization by monoclonal and  
379 serum-derived polyclonal antibodies. *Nat Med* 27,717-726.
- 380 Collier, D.A., De Marco, A., Ferreira, I., Meng, B., Datir, R., Walls, A.C., Kemp, S.S., Bassi, J., Pinto, D.,  
381 Fregni, C.S., *et al.* (2021). Sensitivity of SARS-CoV-2 B.1.1.7 to mRNA vaccine-elicited antibodies.

382 Nature 593,136-141.

383 Dai, L., and Gao, G.F. (2021). Viral targets for vaccines against COVID-19. *Nat Rev Immunol* 21, 73-82.

384 Davies, N.G., Jarvis, C.I., Group, C.C.-W., Edmunds, W.J., Jewell, N.P., Diaz-Ordaz, K., and Keogh, R.H.

385 (2021). Increased mortality in community-tested cases of SARS-CoV-2 lineage B.1.1.7. *Nature*

386 593,270-274.

387 Del Rio, C., and Malani, P. (2021). COVID-19 in 2021-Continuing Uncertainty. *JAMA* 325,1389-1390.

388 Dong, E., Du, H., and Gardner, L. (2020). An interactive web-based dashboard to track COVID-19 in real

389 time. *Lancet Infect Dis* 20, 533-534.

390 Galloway, S.E., Paul, P., MacCannell, D.R., Johansson, M.A., Brooks, J.T., MacNeil, A., Slayton, R.B., Tong,

391 S., Silk, B.J., Armstrong, G.L., *et al.* (2021). Emergence of SARS-CoV-2 B.1.1.7 Lineage - United States,

392 December 29, 2020-January 12, 2021. *MMWR Morb Mortal Wkly Rep* 70, 95-99.

393 Garcia-Beltran, W.F., Lam, E.C., St Denis, K., Nitido, A.D., Garcia, Z.H., Hauser, B.M., Feldman, J.,

394 Pavlovic, M.N., Gregory, D.J., Poznansky, M.C., *et al.* (2021). Multiple SARS-CoV-2 variants escape

395 neutralization by vaccine-induced humoral immunity. *Cell* 184,2372-2383.e9.

396 Hou, X., Zhang, X., Wu, X., Lu, M., Wang, D., Xu, M., Wang, H., Liang, T., Dai, J., Duan, H., *et al.* (2020a).

397 Serum Protein Profiling Reveals a Landscape of Inflammation and Immune Signaling in Early-stage

398 COVID-19 Infection. *Mol Cell Proteomics* 19, 1749-1759.

399 Hou, Y.J., Chiba, S., Halfmann, P., Ehre, C., Kuroda, M., Dinno, K.H., 3rd, Leist, S.R., Schafer, A.,

400 Nakajima, N., Takahashi, K., *et al.* (2020b). SARS-CoV-2 D614G variant exhibits efficient replication ex

401 vivo and transmission in vivo. *Science* 370, 1464-1468.

402 Jin, P., Li, J., Pan, H., Wu, Y., and Zhu, F. (2021). Immunological surrogate endpoints of COVID-2019

403 vaccines: the evidence we have versus the evidence we need. *Signal Transduct Target Ther* 6, 48.

404 Kemp, S.A., Collier, D.A., Datir, R.P., Ferreira, I., Gayed, S., Jahun, A., Hosmillo, M., Rees-Spear, C.,

405 Mlcochova, P., Lumb, I.U., *et al.* (2021). SARS-CoV-2 evolution during treatment of chronic infection.

406 *Nature* 592,277-282.

407 Korber, B., Fischer, W.M., Gnanakaran, S., Yoon, H., Theiler, J., Abfalterer, W., Hengartner, N., Giorgi,

408 E.E., Bhattacharya, T., Foley, B., *et al.* (2020). Tracking Changes in SARS-CoV-2 Spike: Evidence that

409 D614G Increases Infectivity of the COVID-19 Virus. *Cell* 182, 812-827 e819.

410 Li, Q., Nie, J., Wu, J., Zhang, L., Ding, R., Wang, H., Zhang, Y., Li, T., Liu, S., Zhang, M., *et al.* (2021).

411 SARS-CoV-2 501Y.V2 variants lack higher infectivity but do have immune escape. *Cell*

412 184,2362-2371.e9.

413 Li, Q., Wu, J., Nie, J., Zhang, L., Hao, H., Liu, S., Zhao, C., Zhang, Q., Liu, H., Nie, L., *et al.* (2020). The

414 Impact of Mutations in SARS-CoV-2 Spike on Viral Infectivity and Antigenicity. *Cell* 182, 1284-1294

415 e1289.

416 Liang, T., Cheng, M., Teng, F., Wang, H., Deng, Y., Zhang, J., Qin, C., Guo, S., Zhao, H., and Yu, X. (2021).

417 Proteome-wide epitope mapping identifies a resource of antibodies for SARS-CoV-2 detection and

418 neutralization. *Signal Transduct Target Ther* 6, 166.

419 Liu, Y., Liu, J., Xia, H., Zhang, X., Fontes-Garfias, C.R., Swanson, K.A., Cai, H., Sarkar, R., Chen, W., Cutler,

420 M., *et al.* (2021). Neutralizing Activity of BNT162b2-Elicited Serum. *N Engl J Med* 384,1466-1468.

421 Madhi, S.A., Baillie, V., Cutland, C.L., Voysey, M., Koen, A.L., Fairlie, L., Padayachee, S.D., Dheda, K.,

422 Barnabas, S.L., Bhorat, Q.E., *et al.* (2021). Efficacy of the ChAdOx1 nCoV-19 Covid-19 Vaccine against

423 the B.1.351 Variant. *N Engl J Med*, NEJMoa2102214.

424 Mercado, N.B., Zahn, R., Wegmann, F., Loos, C., Chandrashekar, A., Yu, J., Liu, J., Peter, L., McMahan, K.,

425 Tostanoski, L.H., *et al.* (2020). Single-shot Ad26 vaccine protects against SARS-CoV-2 in rhesus

426 macaques. *Nature* 586, 583-588.

427 Muecksch, F., Weisblum, Y., Barnes, C.O., Schmidt, F., Schaefer-Babajew, D., Lorenzi, J.C.C., Flyak, A.I.,  
428 DeLaitich, A.T., Huey-Tubman, K.E., Hou, S., *et al.* (2021). Development of potency, breadth and  
429 resilience to viral escape mutations in SARS-CoV-2 neutralizing antibodies. *bioRxiv*.

430 Nie, J., Li, Q., Wu, J., Zhao, C., Hao, H., Liu, H., Zhang, L., Nie, L., Qin, H., Wang, M., *et al.* (2020).  
431 Quantification of SARS-CoV-2 neutralizing antibody by a pseudotyped virus-based assay. *Nat Protoc* 15,  
432 3699-3715.

433 Prevost, J., and Finzi, A. (2021). The great escape? SARS-CoV-2 variants evading neutralizing responses.  
434 *Cell Host Microbe* 29, 322-324.

435 Priesemann, V., Balling, R., Brinkmann, M.M., Ciesek, S., Cypionka, T., Eckerle, I., Giordano, G., Hanson,  
436 C., Hel, Z., Hotulainen, P., *et al.* (2021). An action plan for pan-European defence against new  
437 SARS-CoV-2 variants. *Lancet* 397, 469-470.

438 Singh, A., Steinkellner, G., Kochl, K., Gruber, K., and Gruber, C.C. (2021). Serine 477 plays a crucial role  
439 in the interaction of the SARS-CoV-2 spike protein with the human receptor ACE2. *Sci Rep* 11, 4320.

440 Stamatatos, L., Czartoski, J., Wan, Y.H., Homad, L.J., Rubin, V., Glantz, H., Neradilek, M., Seydoux, E.,  
441 Jennewein, M.F., MacCamy, A.J., *et al.* (2021). mRNA vaccination boosts cross-variant neutralizing  
442 antibodies elicited by SARS-CoV-2 infection. *Science*, eabg9175.

443 Starr, T.N., Greaney, A.J., Dingens, A.S., and Bloom, J.D. (2021). Complete map of SARS-CoV-2 RBD  
444 mutations that escape the monoclonal antibody LY-CoV555 and its cocktail with LY-CoV016. *Cell Rep*  
445 *Med* 2,100255.

446 Starr, T., Czudnochowski, N., Zatta, F., Park, Y., Veessler, D., Corti, D., Bloom, J., and Snell, G. (2021).  
447 Antibodies to the SARS-CoV-2 receptor-binding domain that maximize breadth and resistance to viral  
448 escape. *bioRxiv*.

449 Tan, C.W., Chia, W.N., Qin, X., Liu, P., Chen, M.L., Tiu, C., Hu, Z., Chen, V.C., Young, B.E., Sia, W.R., *et al.*  
450 (2020). A SARS-CoV-2 surrogate virus neutralization test based on antibody-mediated blockage of  
451 ACE2-spike protein-protein interaction. *Nat Biotechnol* 38, 1073-1078.

452 Wang, H., Wu, X., Zhang, X., Hou, X., Liang, T., Wang, D., Teng, F., Dai, J., Duan, H., Guo, S., *et al.* (2020).  
453 SARS-CoV-2 Proteome Microarray for Mapping COVID-19 Antibody Interactions at Amino Acid  
454 Resolution. *ACS Cent Sci* 6, 2238-2249.

455 Wang, P., Nair, M.S., Liu, L., Iketani, S., Luo, Y., Guo, Y., Wang, M., Yu, J., Zhang, B., Kwong, P.D., *et al.*  
456 (2021a). Antibody Resistance of SARS-CoV-2 Variants B.1.351 and B.1.1.7. *Nature* 593,130-135.

457 Wang, P., Wang, M., Yu, J., Cerutti, G., Nair, M.S., Huang, Y., Kwong, P.D., Shapiro, L., and Ho, D.D.  
458 (2021b). Increased Resistance of SARS-CoV-2 Variant P.1 to Antibody Neutralization. *bioRxiv*.

459 Wang, H., Hou, X., Zhang, X., Wu, X., Liang, T., Wang, D., Teng, F., Dai, J., Duan, H., Guo, S., *et al.*  
460 (2020). SARS-CoV-2 proteome microarray for mapping COVID-19 antibody interactions at amino acid  
461 resolution. *ACS Cent Sci* 6,2238-2249.

462 Weisblum, Y., Schmidt, F., Zhang, F., DaSilva, J., Poston, D., Lorenzi, J.C., Muecksch, F., Rutkowska, M.,  
463 Hoffmann, H.H., Michailidis, E., *et al.* (2020). Escape from neutralizing antibodies by SARS-CoV-2 spike  
464 protein variants. *Elife* 9,e61312.

465 Wibmer, C.K., Ayres, F., Hermanus, T., Madzivhandila, M., Kgagudi, P., Oosthuysen, B., Lambson, B.E.,  
466 de Oliveira, T., Vermeulen, M., van der Berg, K., *et al.* (2021). SARS-CoV-2 501YV2 escapes  
467 neutralization by South African COVID-19 donor plasma. *Nat Med* 27,622-625.

468 Wu, Z., Hu, Y., Xu, M., Chen, Z., Yang, W., Jiang, Z., Li, M., Jin, H., Cui, G., Chen, P., *et al.* (2021). Safety,  
469 tolerability, and immunogenicity of an inactivated SARS-CoV-2 vaccine (CoronaVac) in healthy adults

470 aged 60 years and older: a randomised, double-blind, placebo-controlled, phase 1/2 clinical trial.  
471 *Lancet Infect Dis*,S1473-3099(20)30987-7.  
472 Xu, M., Deng, J., Xu, K., Zhu, T., Han, L., Yan, Y., Yao, D., Deng, H., Wang, D., Sun, Y., *et al.* (2019).  
473 In-depth serum proteomics reveals biomarkers of psoriasis severity and response to traditional  
474 Chinese medicine. *Theranostics* *9*, 2475-2488.  
475 Xu, M., Wang, D., Wang, H., Zhang, X., Liang, T., Zhang, K., Zhang, J., Xu, D., and Yu, X. (2020).  
476 COVID-19 diagnostic testing: Technology perspective. *Clin Transl Med*, e158.  
477 Yu, J., Tostanoski, L.H., Peter, L., Mercado, N.B., McMahan, K., Mahrokhian, S.H., Nkolola, J.P., Liu, J., Li,  
478 Z., Chandrashekar, A., *et al.* (2020). DNA vaccine protection against SARS-CoV-2 in rhesus macaques.  
479 *Science* *369*, 806-811.  
480 Zhang, L., Jackson, C.B., Mou, H., Ojha, A., Peng, H., Quinlan, B.D., Rangarajan, E.S., Pan, A.,  
481 Vanderheiden, A., Suthar, M.S., *et al.* (2020a). SARS-CoV-2 spike-protein D614G mutation increases  
482 virion spike density and infectivity. *Nat Commun* *11*, 6013.  
483 Zhang, N.N., Li, X.F., Deng, Y.Q., Zhao, H., Huang, Y.J., Yang, G., Huang, W.J., Gao, P., Zhou, C., Zhang,  
484 R.R., *et al.* (2020b). A Thermostable mRNA Vaccine against COVID-19. *Cell* *182*, 1271-1283 e1216.  
485 Zhou, D., Dejnirattisai, W., Supasa, P., Liu, C., Mentzer, A.J., Ginn, H.M., Zhao, Y., Duyvesteyn, H.M.E.,  
486 Tuekprakhon, A., Nutalai, R., *et al.* (2021). Evidence of escape of SARS-CoV-2 variant B.1.351 from  
487 natural and vaccine-induced sera. *Cell* *184*,2348-2361.

488

## 489 **Contributions**

490 J.Z. and L.X. provided the purified spike variant proteins. M. Z., S. Y., C. H., Y.  
491 H., and Y. W. provided the clinical samples. X. Z., H. W., J. Z., J. R., H. B., and  
492 X. Y. executed microarray experiments. X. Z., T. L., H. P., S. L., C.W., and X.Y.  
493 executed the bioinformatics and statistical analyses. J.V. executed the  
494 pseudovirus based neutralization assay. H. Z., M. L., X. H., and B. K. executed  
495 the authentic virus-based neutralization assay. X.Y., Y. W., and B. K. conceived  
496 the idea, designed experiments, analyzed the data, and wrote the manuscript.

497

## 498 **Acknowledgement**

499 This work was supported by the National Natural Science Foundation of China  
500 (31870823), National Key R&D Program of China (2020YFE0202200), State

501 Key Laboratory of Proteomics (SKLP-C202001, SKLP-O201904,  
502 SKLP-O201703, SKLP-O202007), the National Program on Key Basic  
503 Research Project (2018YFA0507503, 2017YFC0906703, 2018ZX09733003)  
504 and the Beijing Municipal Education Commission, Beijing Municipal Natural  
505 Science Foundation (M21003) and Beijing Municipal Science & Technology  
506 Commission (Z201100001020001; Z201100005420022). We thank Dr.  
507 Brianne Petritis for her critical review and editing of this manuscript.

508

### 509 **Competing interests**

510 None declared.

511

### 512 **Supplemental information**

513 The supplemental information includes 3 supplementary tables and 9  
514 supplementary figures.

515

### 516 **Figures and legends**

517 **Figure 1. Development of the mSAIS assay.** (A) A schematic illustration of  
518 the microarray-based mSAIS assay and potential biomedical applications; (B,  
519 C) Intra- and inter-array reproducibility of the mSAIS assay in the absence and  
520 presence of neutralizing antibodies, respectively.

521

522 **Figure 2. SARS-CoV-2 S-ACE2 interaction mapping across different S**

523 **variants using the mSAIS assay.** (A) Detection of different concentrations of  
524 ACE2 binding to S variants immobilized on the array. (B) Distribution of  
525 S-ACE2 binding affinities (EC50) across different SARS-CoV-2 S variants. (C)  
526 Fold changes of binding affinity between the wild-type and mutated S proteins.  
527 The x-axis represents the S variants and the y-axis represents the log2  
528 transformed IC50 ratio between the wild-type and mutated S proteins. (D) are  
529 the dynamic curves representing S variants that bind to ACE2 with significantly  
530 decreased binding affinity compared to the wild-type S protein. (E) Structural  
531 analysis of escape mutations on the RBD (gray color) that interacts with ACE2  
532 (green color). RBD mutations (PDB ID: 6M0J) are labelled in red.

533

534 **Figure 3. Heterogeneous responses of purified antibodies to**  
535 **SARS-CoV-2 mutations.** (A-C) Distribution of neutralization activity (IC50) of  
536 purified antibodies #73, #21 and #53 to the S variants, respectively. The x-axis  
537 represents the S variants and the y-axis represents the neutralization activity  
538 (IC50) of the monoclonal antibody to each spike variant. (D, E) Fold changes  
539 of the neutralization activity (IC50) of antibodies #21 and #53 between the  
540 wild-type and mutant S proteins, respectively. The x-axis represents the S  
541 variants and the y-axis represents the log2 transformed IC50 ratio between the  
542 wild-type and mutated S proteins. (F, G) Structural analysis of the mutations  
543 that decrease and increase the neutralization activity of antibodies #21 and  
544 #53, respectively.

545

546 **Figure 4. Heterogeneous responses of serological NAbS to SARS-CoV-2**

547 **S mutations in convalescent COVID-19 patients.** (A) Hierarchical cluster

548 analysis of NAbS to S variants in convalescent COVID-19 patients. The

549 rainbow color from white to red correspond to the NAb titer from low to high,

550 respectively. (B) EC50 comparison of convalescent COVID-19 patients with

551 high and low NAb titers. (C) Comparison of escape mutations between

552 convalescent COVID-19 patients with high and low NAb titers with EC50

553 thresholds set at 10, 30 and 50, respectively. (D) Distribution of serological

554 NAbS to different SARS-CoV-2 S variants in convalescent COVID-19 patients.

555 (E) Comparison of NAbS between the wild-type and D614G S proteins. (F)

556 Comparison of NAbS between the wild-type S protein and S variants with

557 known escape mutations. (G) Comparison of NAbS between the wild-type S

558 protein and S variants with newly identified escape mutations. Significant

559 escape mutations were identified using an unpaired t test with a p value of

560 0.05.

561

562 **Figure 5. Heterogeneous responses of serological NAbS to the**

563 **SARS-CoV-2 S mutations in vaccinated individuals.** (A) Hierarchical cluster

564 analysis of NAbS to S variants in vaccinees. The rainbow color from white to

565 red correspond the NAb titers from low to high, respectively. (B) EC50

566 comparison of vaccinees with high and low NAb titers. (C) Comparison of

567 escape mutations between vaccinees with high and low NAb titers with EC50  
568 thresholds set at 10, 20 and 30, respectively. (D) Distribution of serological  
569 NAbs to different SARS-CoV-2 S variants in vaccinees. (E) Comparison of  
570 NAbs between the wild-type and D614G S proteins. (F) Comparison of NAbs  
571 between the wild-type S protein and S variants with known escape mutations.  
572 (G) Comparison of NAbs between the wild-type S protein and S variants with  
573 newly-identified escape mutations. Significant escape mutations were  
574 identified using an unpaired t test with a p-value of 0.05. (H) Detection of  
575 serological NAbs to prevalent SARS-CoV-2 variants in the vaccinees using the  
576 pseudovirus neutralization assay. (I) Hierarchical cluster analysis of the NAbs  
577 to prevalent SARS-CoV-2 variants in vaccinees. The rainbow color from white  
578 to red correspond the NAb titers from low to high, respectively.

579

580 **Figure 6. The NAb titer is associated with the diversity of anti-S**  
581 **antibodies in the serum of vaccinees.** (A) A comparison of levels of  
582 antibodies that target the S1, RBD and S2 ECD. (B) Identification of  
583 vaccine-induced humoral immune responses to the S protein. (C) Association  
584 between the number of immunogenic peptides and NAb titers. A p-value ( $p$ ) <  
585 0.05 by Mann-Whitney test was considered to be significant. NTD = N-terminal  
586 domain

587

588 **Figure 7. Validation of anti-S antibody diversity in 104 vaccinees.** (A) A



589 comparison of levels of antibodies that target the S proteins and its domains.  
590 (B) Landscape of vaccine-induced humoral immune responses to the S protein.  
591 (C) Association between the number of immunogenic peptides and NAb titers.  
592 A p-value ( $p$ ) < 0.05 by Mann-Whitney test was considered to be significant.  
593 CTD = C-terminal domain; NTD = N-terminal domain. The NAb titers (ND50)  
594 was measured using pseudovirus neutralization assay.

595

## 596 **Materials and methods**

### 597 **Collection of patient samples**

598 Clinical specimens were obtained from the Department of Clinical Laboratory  
599 in Beijing Ditan Hospital, Capital Medical University (Beijing, China). Whole  
600 blood was collected in a vacutainer tube, and centrifuged at 4,000×g at room  
601 temperature (RT) for 10 minutes to separate serum. Serum was then  
602 transferred to a clean tube and stored at -80°C until use. For safety purposes,  
603 serum collected from convalescent COVID-19 patients was inactivated at 56°C  
604 for 30 minutes prior to any further sample processing. Notably, serum from  
605 COVID-19 vaccinated individuals was obtained from healthy hospital staff 4  
606 weeks after receiving the second vaccine dose, and convalescent samples  
607 were collected from COVID-19 patients 2 to 4 weeks post discharge. Our  
608 research was approved by the Ethics Committee of Beijing Ditan Hospital (No.  
609 2021-010-01), and exemption of informed consent was obtained prior to sera  
610 collection.

611

612 **Expression and purification of recombinant proteins for use on the**  
613 **mSAIS assay**

614 The DNA sequence encoding the SARS-CoV-2 Spike protein (S1+S2 ECD)  
615 (YP\_009724390.1) (Val 16-Pro1213), S1 Subunit (YP\_009724390.1)  
616 (Val16-Arg685), RBD (YP\_009724390.1) (Arg319-Phe541) or variants were  
617 expressed with a polyhistidine tag at the C-terminus. The generation of  
618 variants using site-directed mutagenesis was performed as previously  
619 described (Li et al., 2020). In addition, two negative controls [SARS-CoV-2  
620 Nucleocapsid (N), MERS-CoV-2 Spike RBD], one positive control  
621 (SARS-CoV-2 wild-type RBD), and the extracellular domain of ACE2 were  
622 expressed with a polyhistidine tag at the C-terminus. The proteins were  
623 expressed in HEK293 cells, followed by further purification on a Ni-NTA spin  
624 column (Thermo Fisher). Protein purity was confirmed using an SDS-PAGE gel  
625 stained with Coomassie blue.

626

627 **Preparation of the mSAIS microarray**

628 All purified proteins were diluted to 100 µg/mL and printed onto a  
629 three-dimensional (3D)-modified slide surface (Capital Biochip Corp, Beijing,  
630 China) in parallel and in duplicate using an Arrayjet microarrayer (Roslin, UK)  
631 as previously described (Hou et al., 2020a; Wang et al., 2020; Xu et al., 2019).

632 The protein microarrays were stored at -20 °C until ready to use.

633

634 **Detection of NAbS using the mSAIS assay**

635 Prior to antibody detection, the protein microarrays were assembled in an  
636 incubation tray and blocked with 1% (w/v) milk in 1x phosphate buffered saline,  
637 pH 7.2 (PBS), with 0.2% (v/v) Tween-20 (PBST) for 10 min at room  
638 temperature. After washing with PBST three times, the array was incubated  
639 with serum diluted 10- to 320-fold in PBST for 30 min at room temperature.  
640 After washing again, the array was then incubated for 60 min with Cy5-labeled  
641 ACE2 (50 ng/mL). Finally, the array was washed with PBST and water,  
642 disassembled from the tray, and dried via centrifugation for 2 min at 2,000 rpm.  
643 The array was scanned with a GenePix 4300A microarray scanner (Molecular  
644 Devices, Sunnyvale, CA, USA) at a 10  $\mu$ m resolution using a laser at 635 nm  
645 with 100% power/ PMT Gain 900. The median fluorescent signal intensity with  
646 background subtraction was extracted using GenePix Pro7 software  
647 (Molecular Devices, Sunnyvale, CA, USA).

648

649 **SARS-CoV-2 pseudovirus neutralization assay**

650 The SARS-CoV-2 pseudovirus neutralization assay was performed as  
651 previously described (Nie et al., 2020). Briefly, human sera were diluted using  
652 3-fold serial dilutions with a starting concentration of 1:10 (two per dilution).  
653 The diluted sera were added into 96-well plates in duplicate, followed by the  
654 SARS-CoV-2 pseudovirus at a concentration of 1300 median tissue culture

655 infective dose (TCID<sub>50</sub>/mL). The sera and pseudovirus were incubated  
656 together at 37°C for 1 hour, and then monkey Vero cells were added at 2\*10<sup>4</sup>  
657 cells/100 mL cells per well. The plates were incubated at 37°C in a humidified  
658 atmosphere with 5% CO<sub>2</sub> for 24 hours before chemiluminescence detection  
659 was performed. The Reed-Muench method was used to calculate the  
660 neutralization titer.

661

### 662 **Live SARS-CoV-2 neutralization assay**

663 A suspension of Vero cells suspension was prepared at a cell density of  
664 2×10<sup>5</sup>/ml. Serum samples were diluted 4-fold in cell culture medium and  
665 inactivated at 56°C for 30 minutes. The inactivated serum was serially diluted  
666 2-fold with MEM medium, followed by the addition of cell culture medium  
667 containing 100 times the cell culture infective dose 50% (CCID<sub>50</sub>) of wild-type  
668 SARS-CoV-2 virus. The mixture was placed into a 96-well plate and incubated  
669 at 37°C for 2 h in CO<sub>2</sub> 5%, and then 2×10<sup>4</sup> Vero cells were added and  
670 incubated again at 37°C. The samples were microscopically examined for  
671 cytopathic effect (CPE) after 7 days. The highest dilution of serum that showed  
672 complete inhibition activity of SARS-CoV-2 was recorded as the neutralizing  
673 antibody titer (ID<sub>50</sub>). Assays were performed in duplicate with negative control  
674 serum.

675 The ID<sub>50</sub> was calculated as:  $\text{LogCCID}_{50} = X_m + 1/2d - d \sum p_i/100$ , where  
676  $X_m$  is the log<sub>10</sub> of maximum dilution of the virus, the  $d$  is the logarithm of the

677 dilution fold, and  $\sum p_i$  is the sum of the percentage of the cytopathic effect per  
678 dilution.

679

## 680 **Detection of SARS-CoV-2 serum antibodies using a SARS-CoV-2** 681 **proteome peptide microarray**

682 The peptide microarray containing truncated S proteins, and tiled peptides  
683 representing SARS-CoV-2 S protein was prepared as our previous work (Liang  
684 et al., 2021; Wang. et al., 2020). The array was assembled in an incubation  
685 tray and blocked with 5% (w/v) milk in phosphate-buffered saline (PBS)  
686 containing 0.05% (v/v) Tween-20 (PBST) for 30 min at room temperature  
687 before antibody detection. After aspirating the blocking solution, the 1:200  
688 diluted serum was added to the array and incubated at room temperature for  
689 20 min. After washing three times with PBST, the array was then incubated for  
690 20 min with a Cy3 labelled donkey anti-human IgG(H+L) antibody (Jackson  
691 ImmunoResearch, USA) (2  $\mu$ g/mL). Finally, the array was washed with PBST  
692 and deionized water, disassembled from the tray and dried with vacuum pump.  
693 The slide was scanned at 532 nm using a GenePix 4300A microarray scanner  
694 (Molecular Devices, Sunnyvale, CA, USA). The median fluorescent signal  
695 intensity of each spot with background subtraction was extracted using  
696 GenePix Pro7 software (Molecular Devices, Sunnyvale, CA, USA).

697

## 698 **Data analysis**

699 The ability of the serological NAbs to inhibit the S-ACE2 interactions across  
700 the different S variants was visualized as a heatmap using the MultiExperiment  
701 Viewer software version 4.9 (Chu et al., 2008). Statistical analyses were  
702 performed using the GraphPad Prism software 8.3 and Microsoft Excel with  
703 the unpaired t test and Mann-Whitney test. A p-value ( $p$ ) < 0.05 was  
704 considered to be significant. \* $p$  < 0.05, \*\* $p$  < 0.01, \*\*\* $p$  < 0.005, \*\*\*\* $p$  < 0.001.  
705 The 3D structure of the SARS-CoV-2 RBD and ACE2 complex (PDB ID code:  
706 6M0J) was visualized using the VMD 1.9.3, and mutations were annotated.

A

## Assay Principle

SARS-CoV-2 spike variant protein microarray

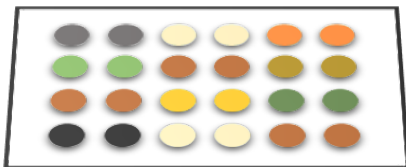

72 spike variant proteins

- K417N
- N501Y
- K417N/E484K/N501Y
- .....

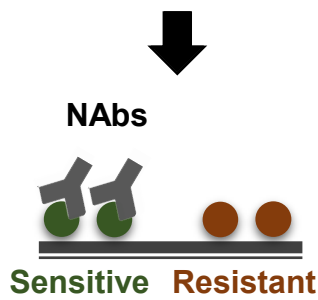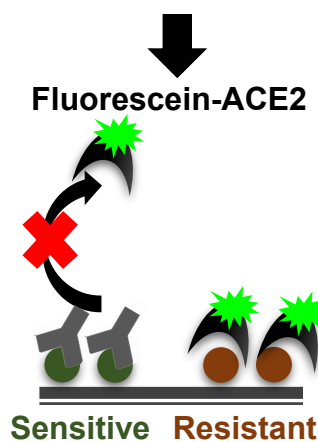

EC50

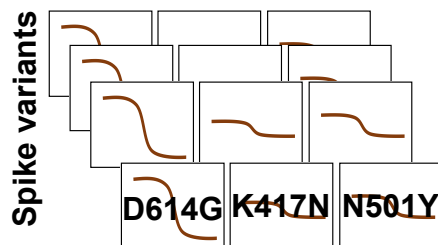

NAbs

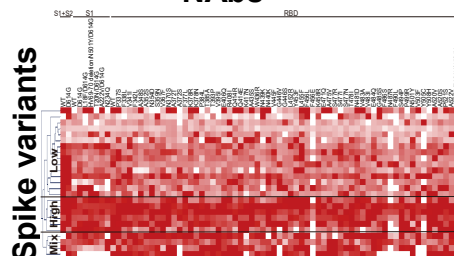

## Applications

Spike variants that are sensitive and resistant to NAbs

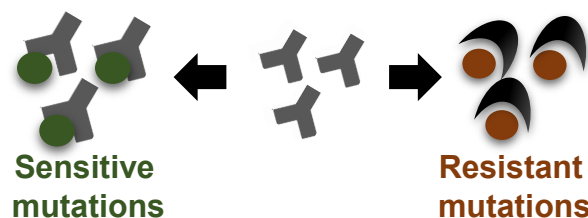

NAbs generated in SARS-CoV-2 infected patients

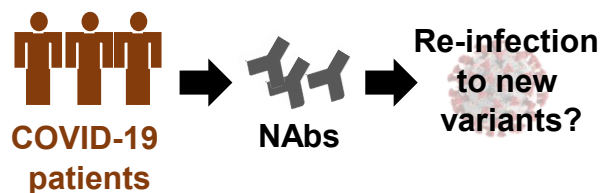

Humoral response to COVID-19 vaccination

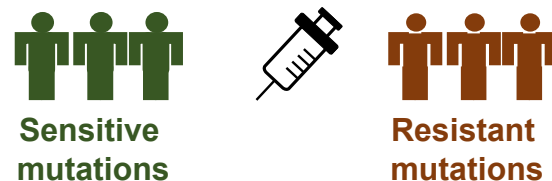

B

Detection of Spike-ACE2 Binding

Within an array

Between different arrays

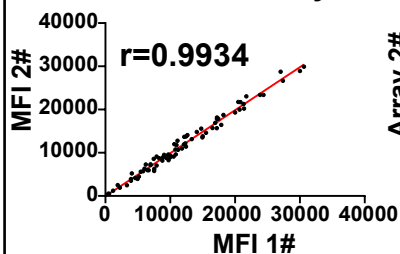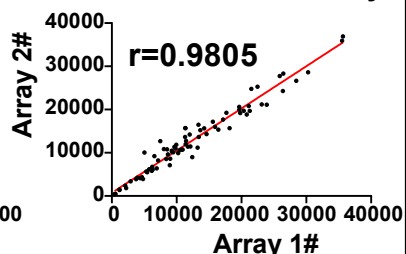

C

Detection of Spike-ACE2 Binding with NAbs

Within an array

Between different arrays

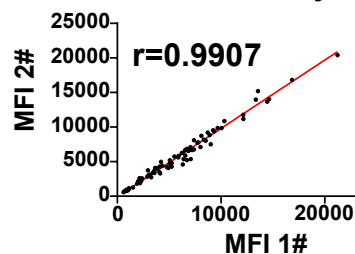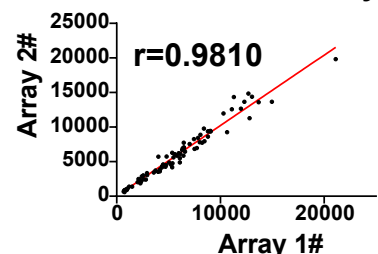

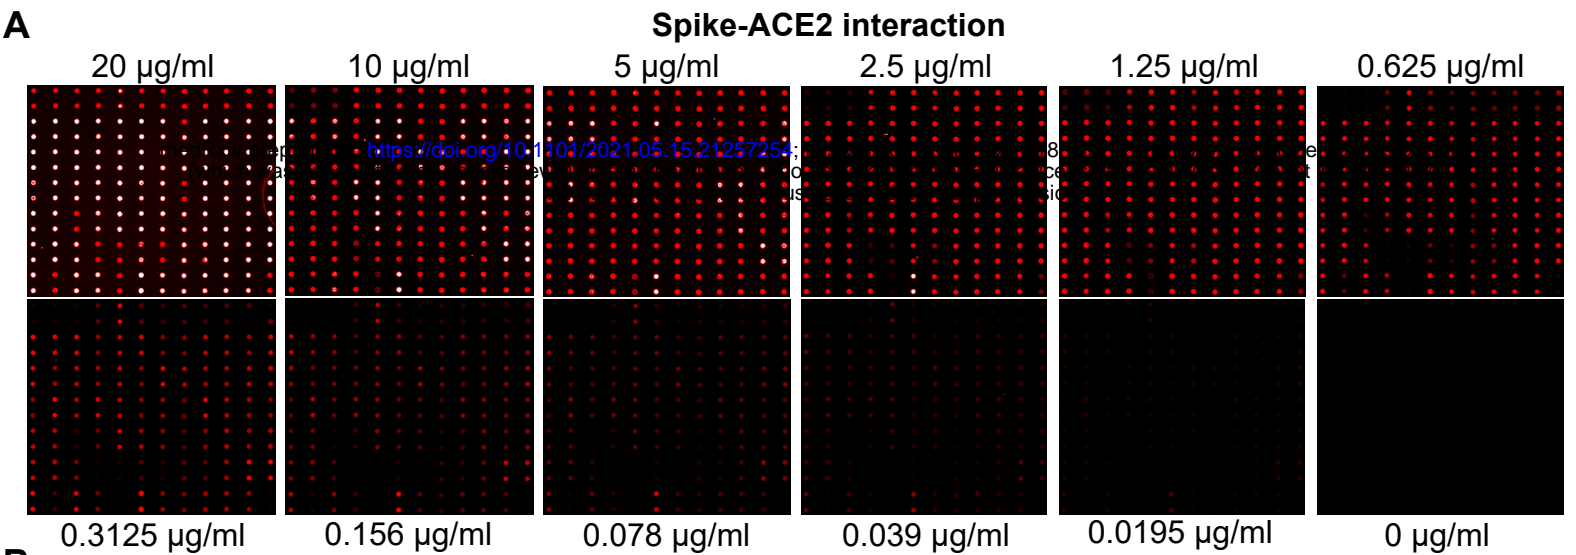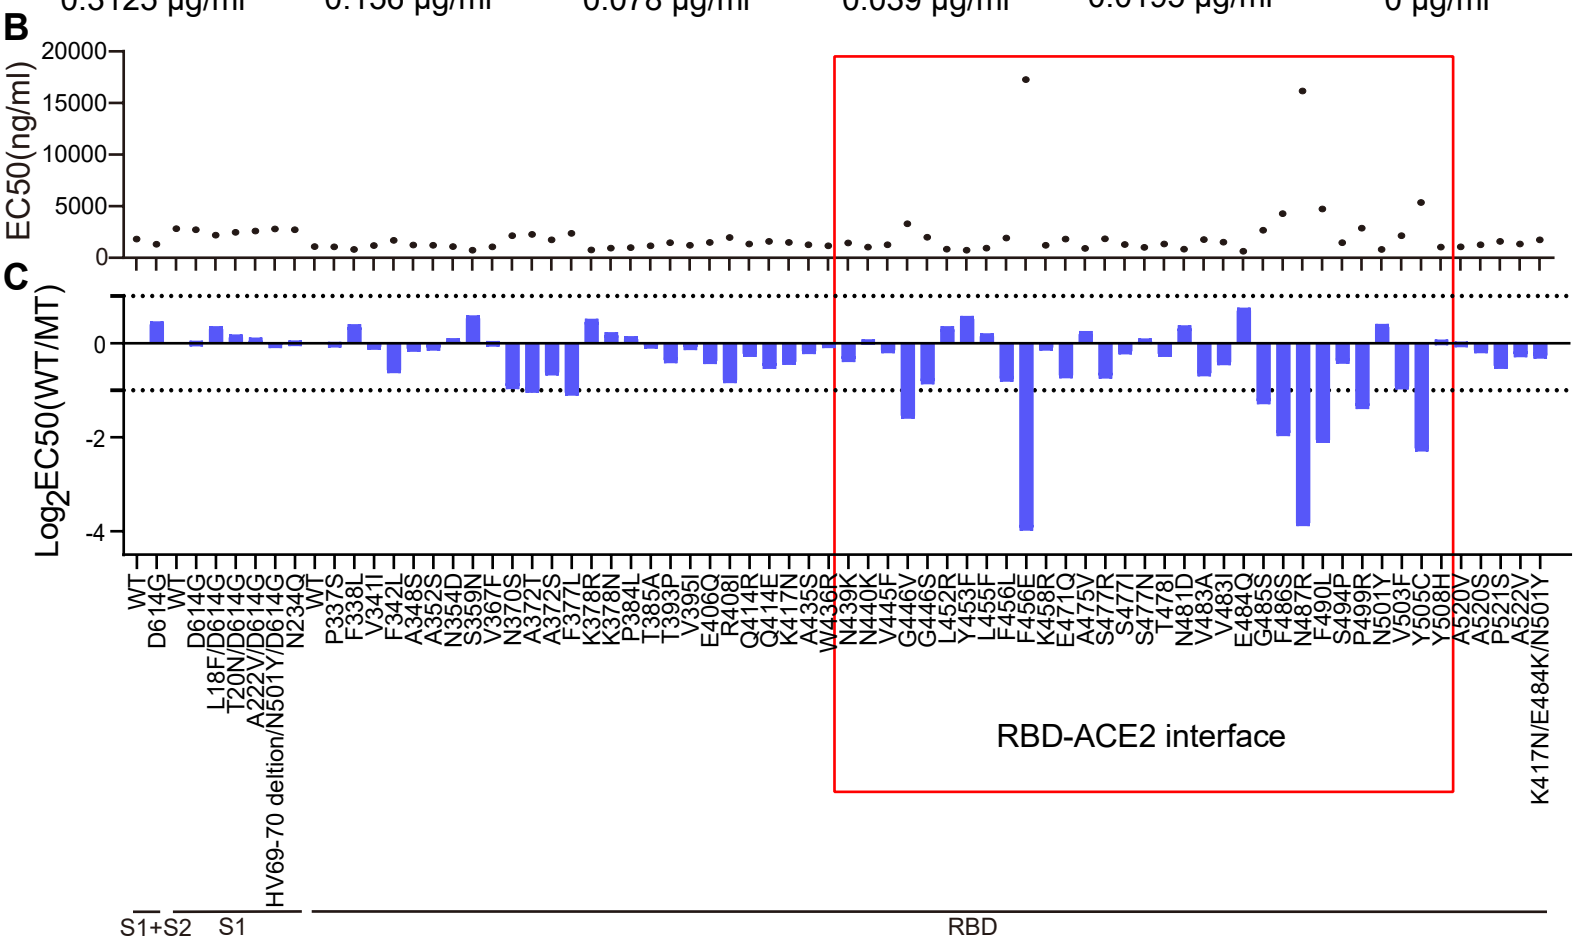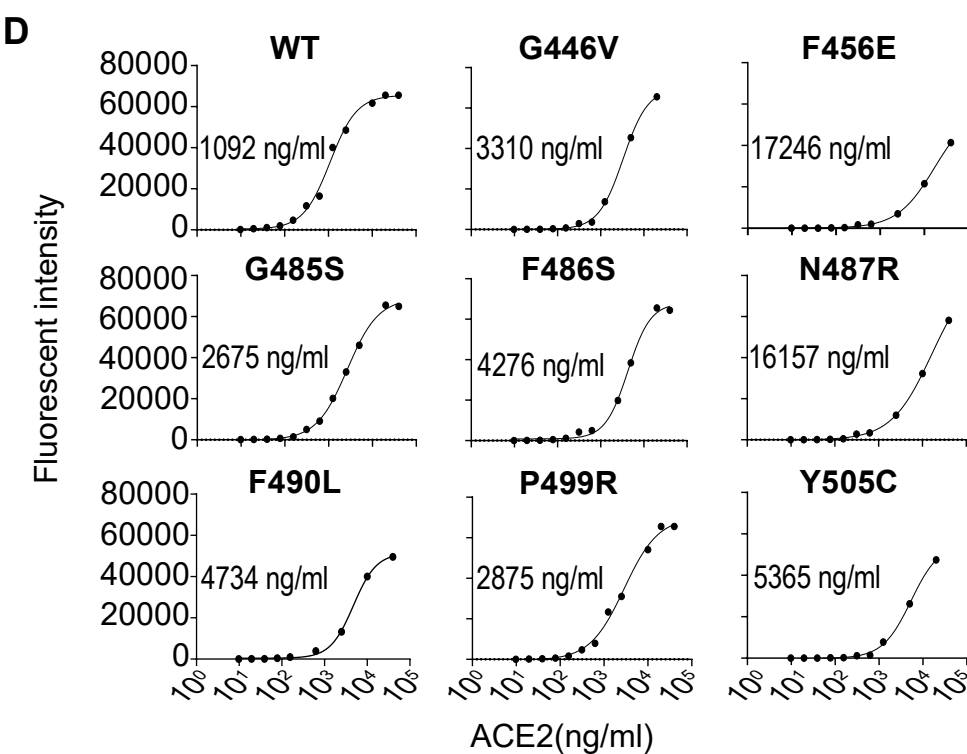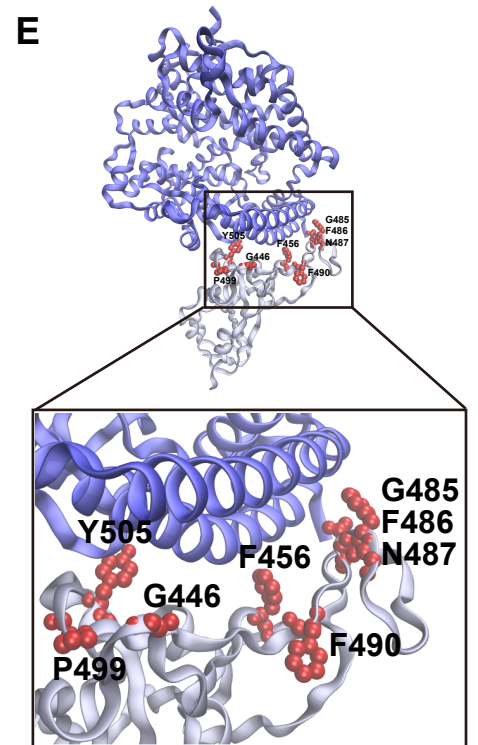



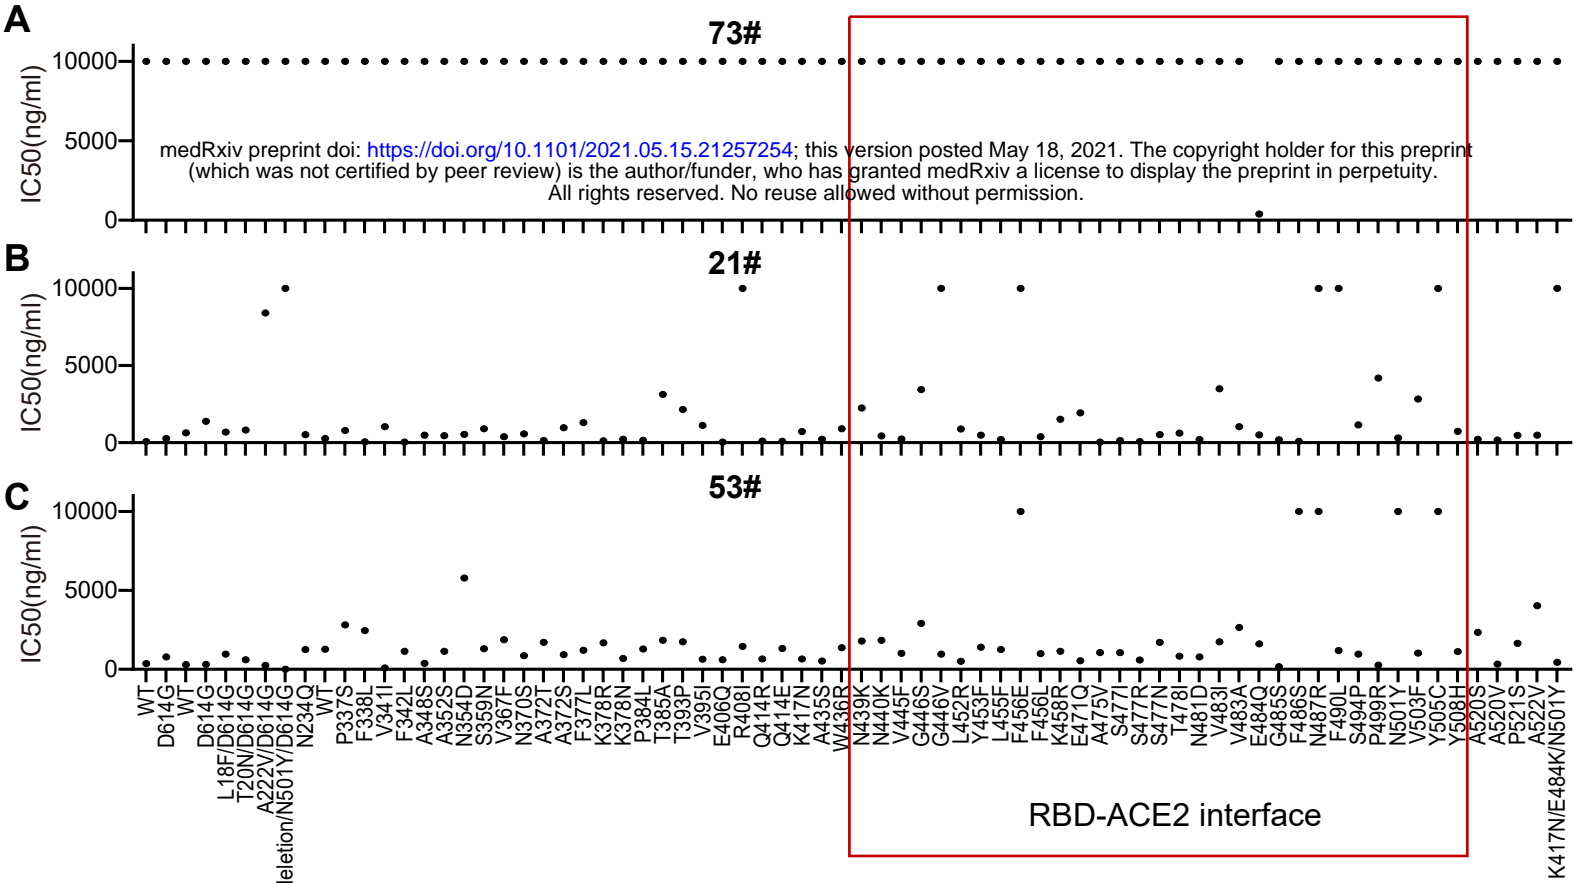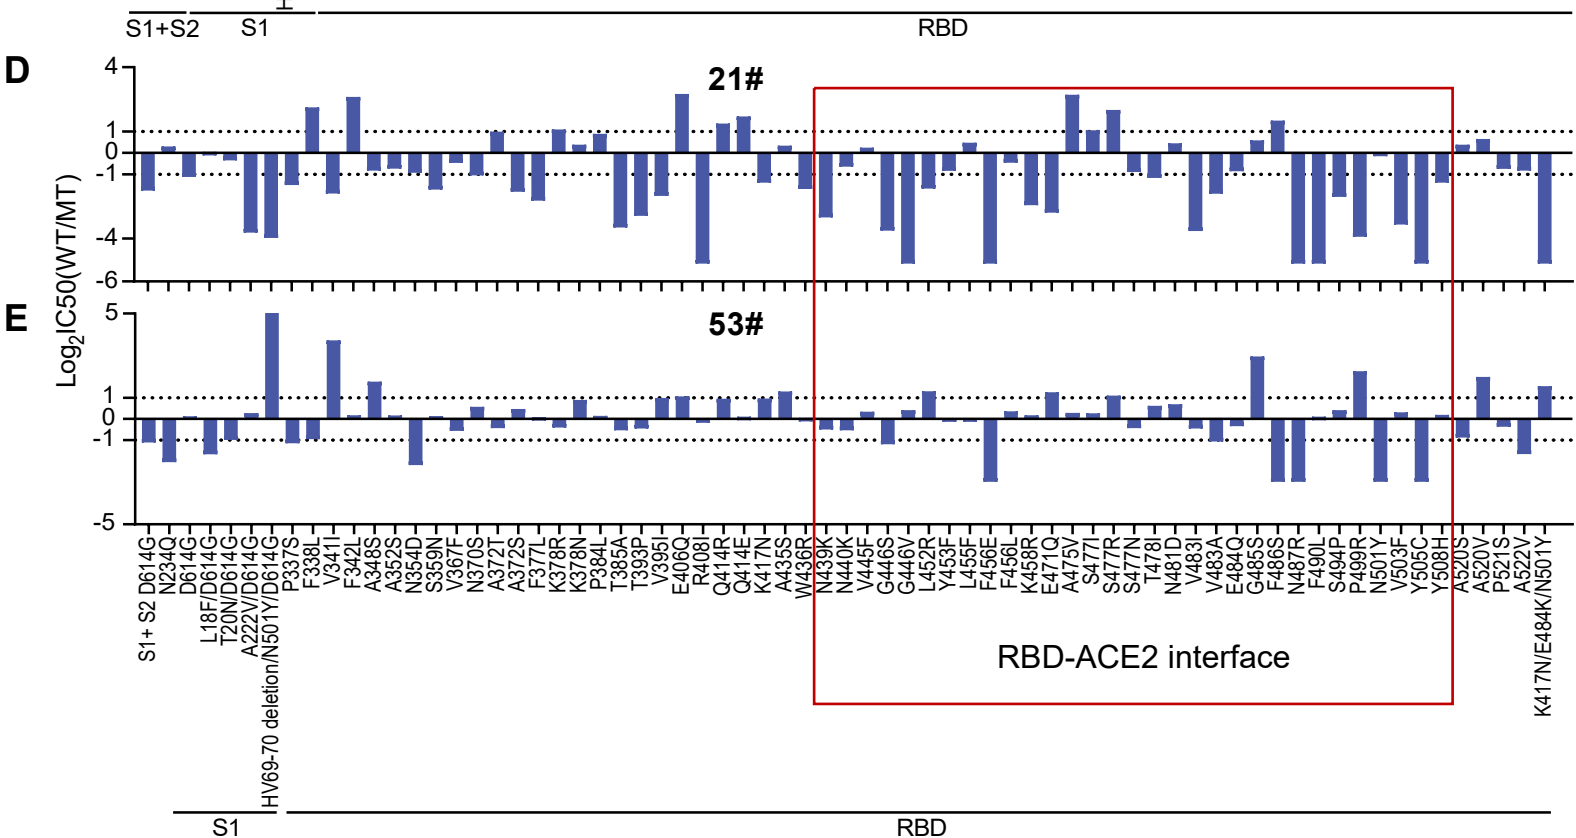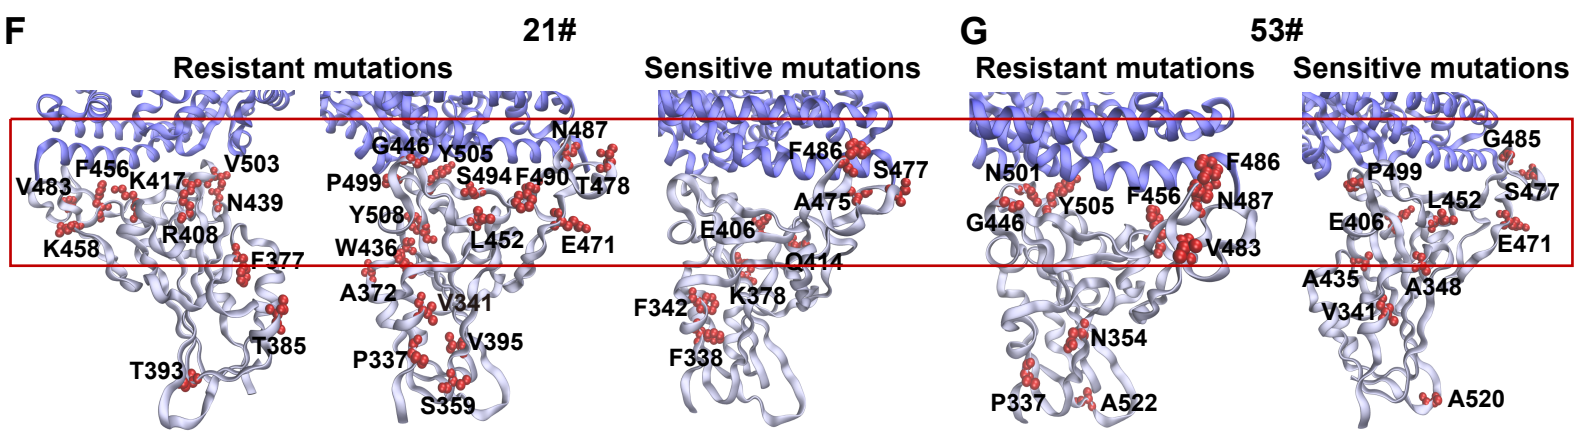

medRxiv preprint doi: <https://doi.org/10.1101/2021.05.15.21257254>; this version posted May 18, 2021. The copyright holder for this preprint (which was not certified by peer review) is the author/funder, who has granted medRxiv a license to display the preprint in perpetuity. All rights reserved. No reuse allowed without permission.

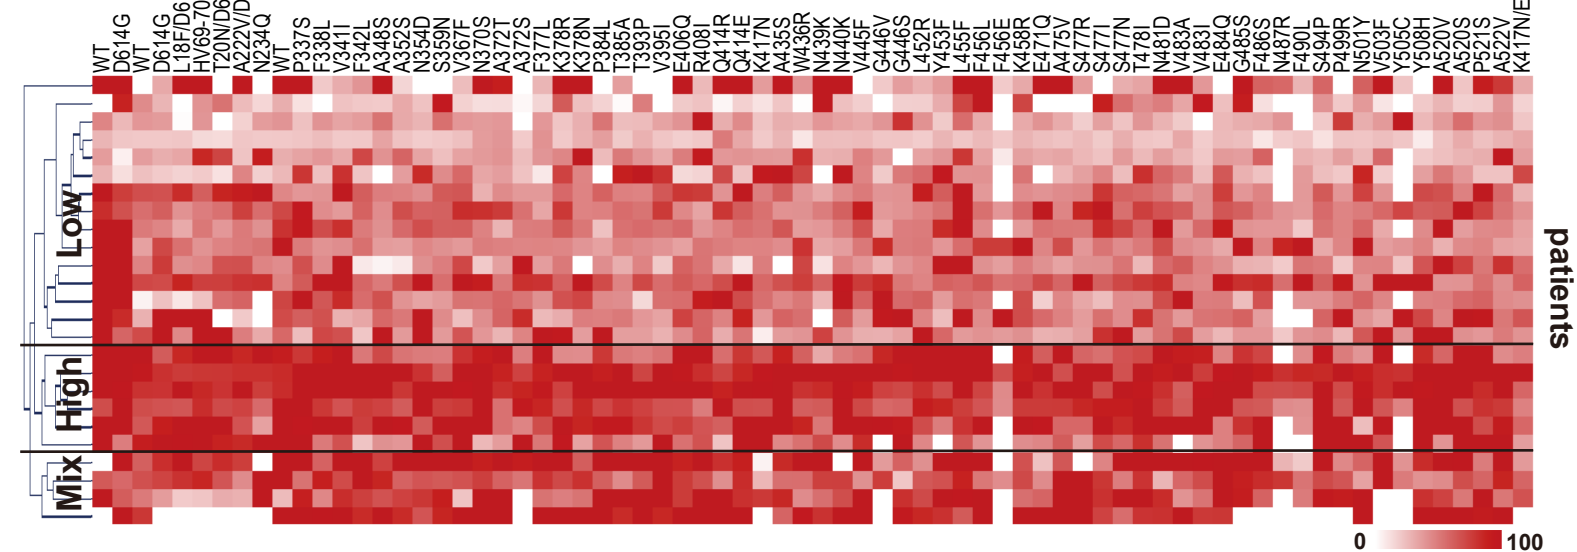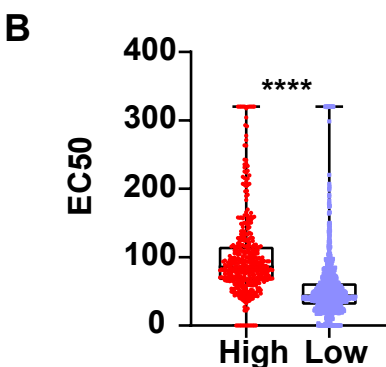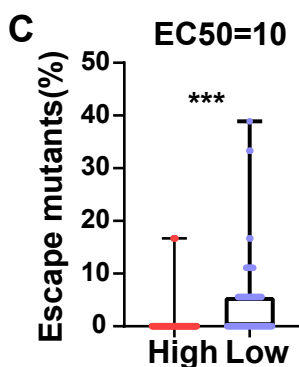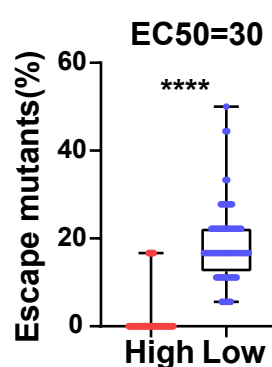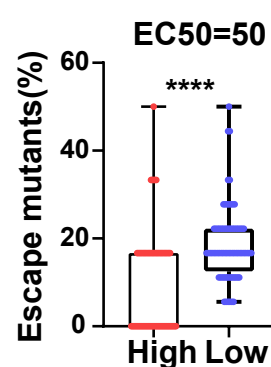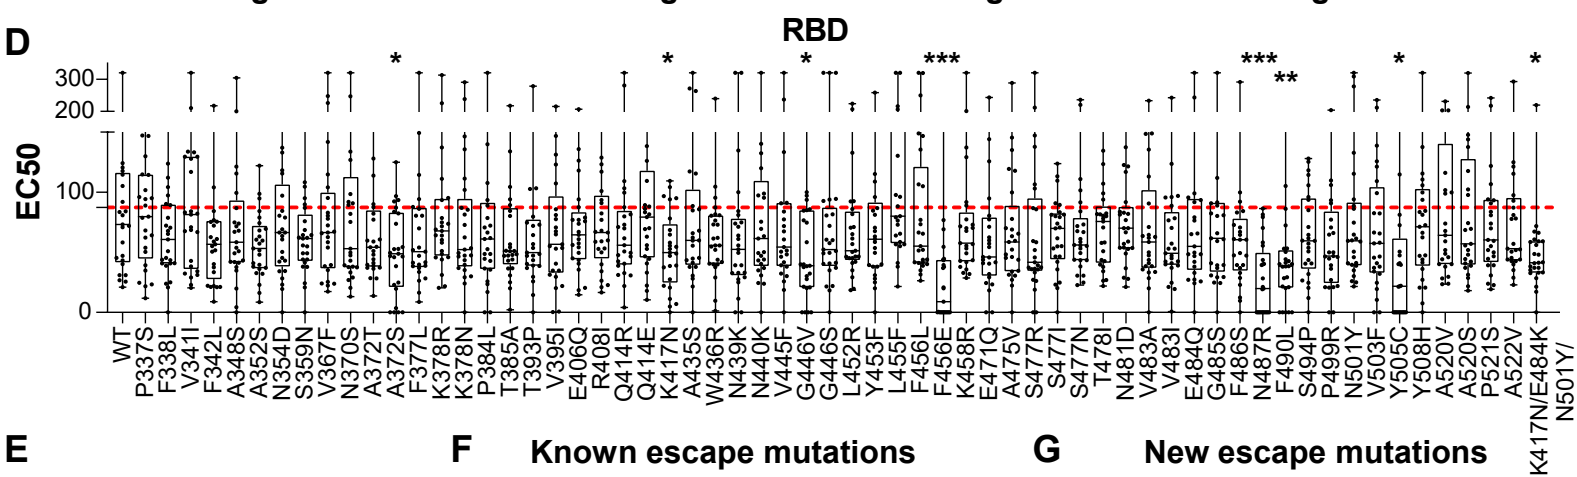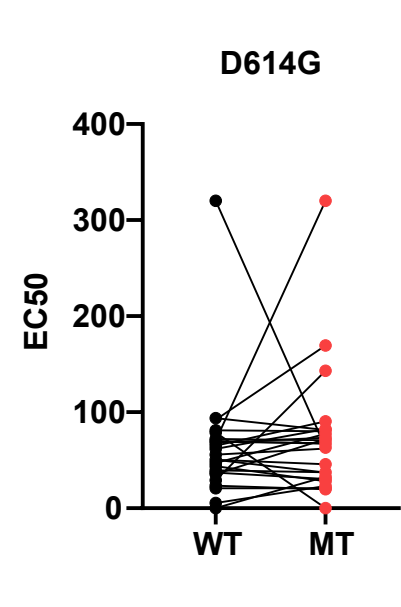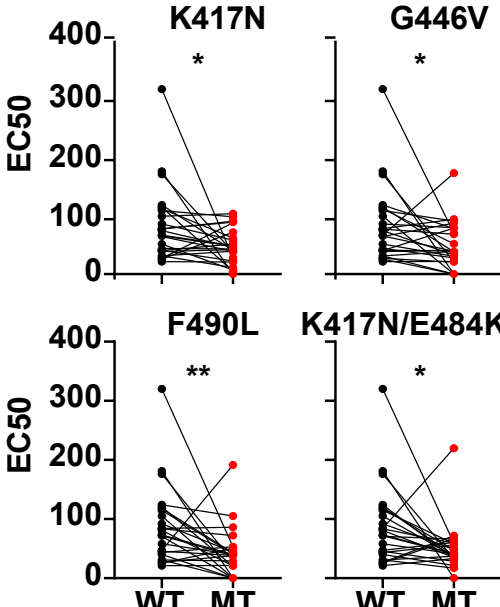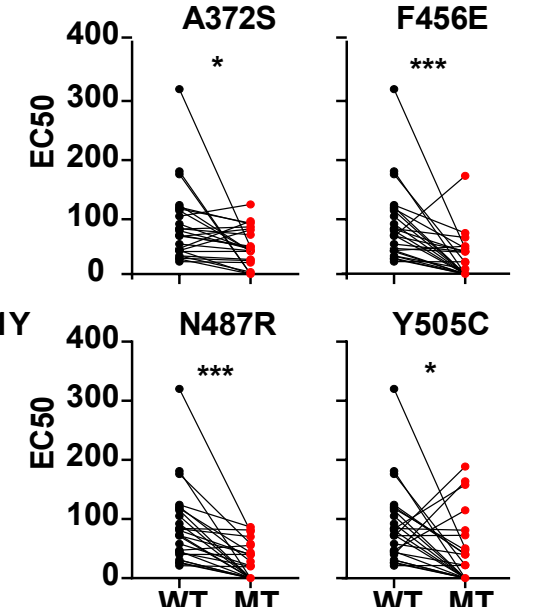

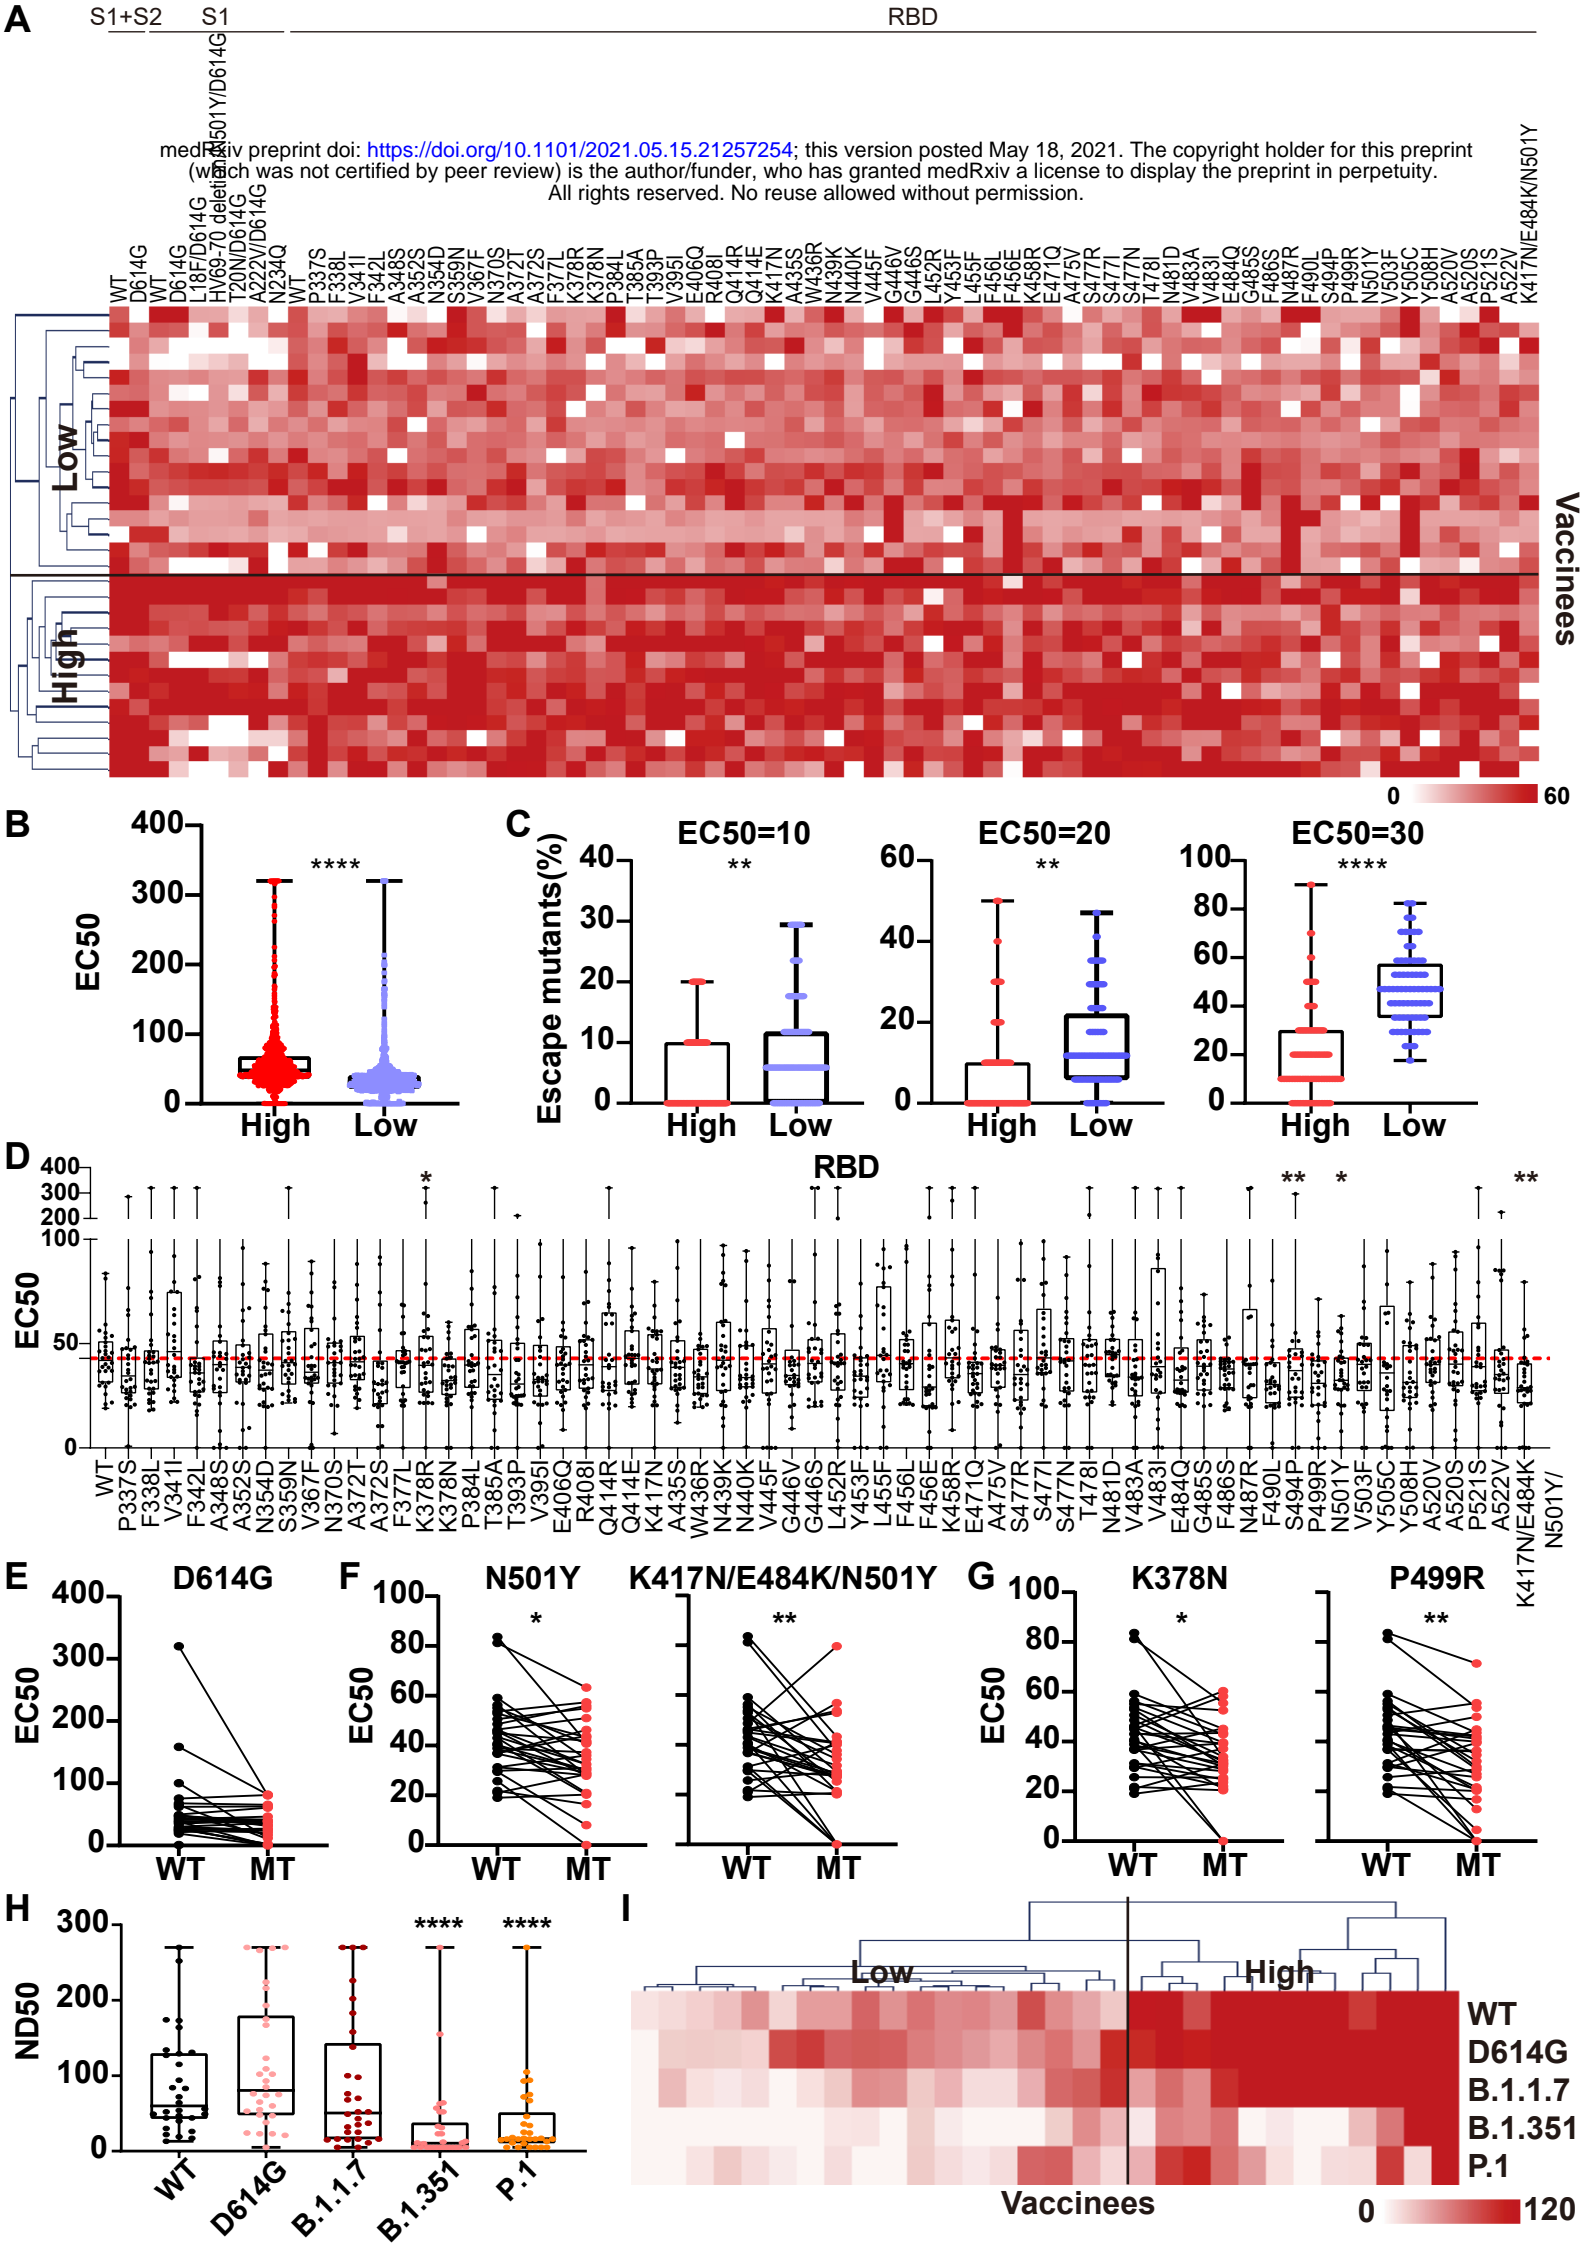

**A**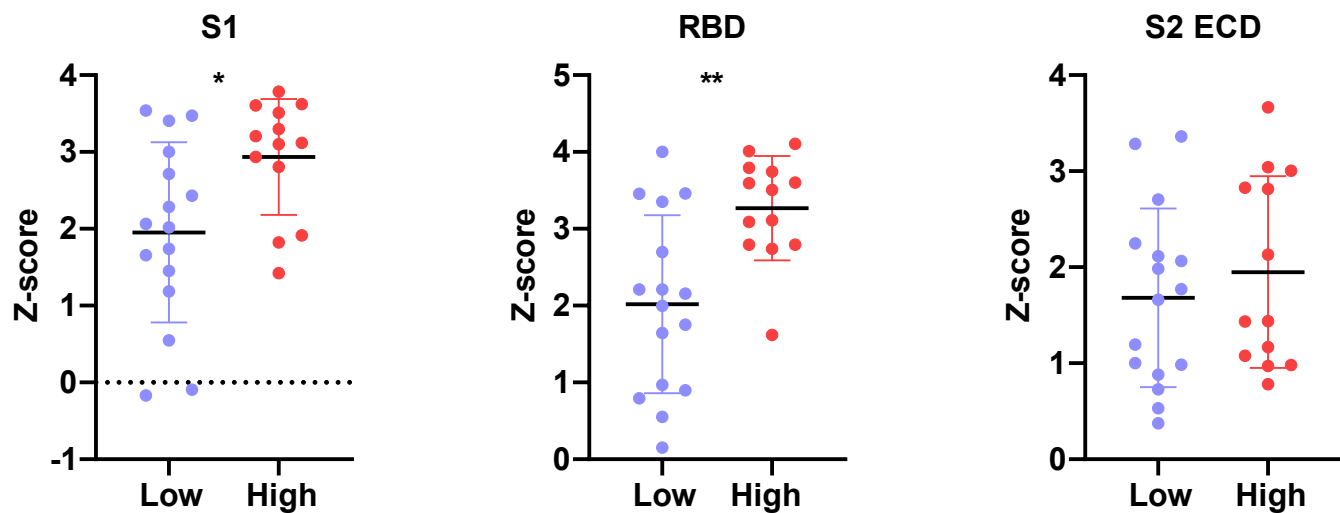**B**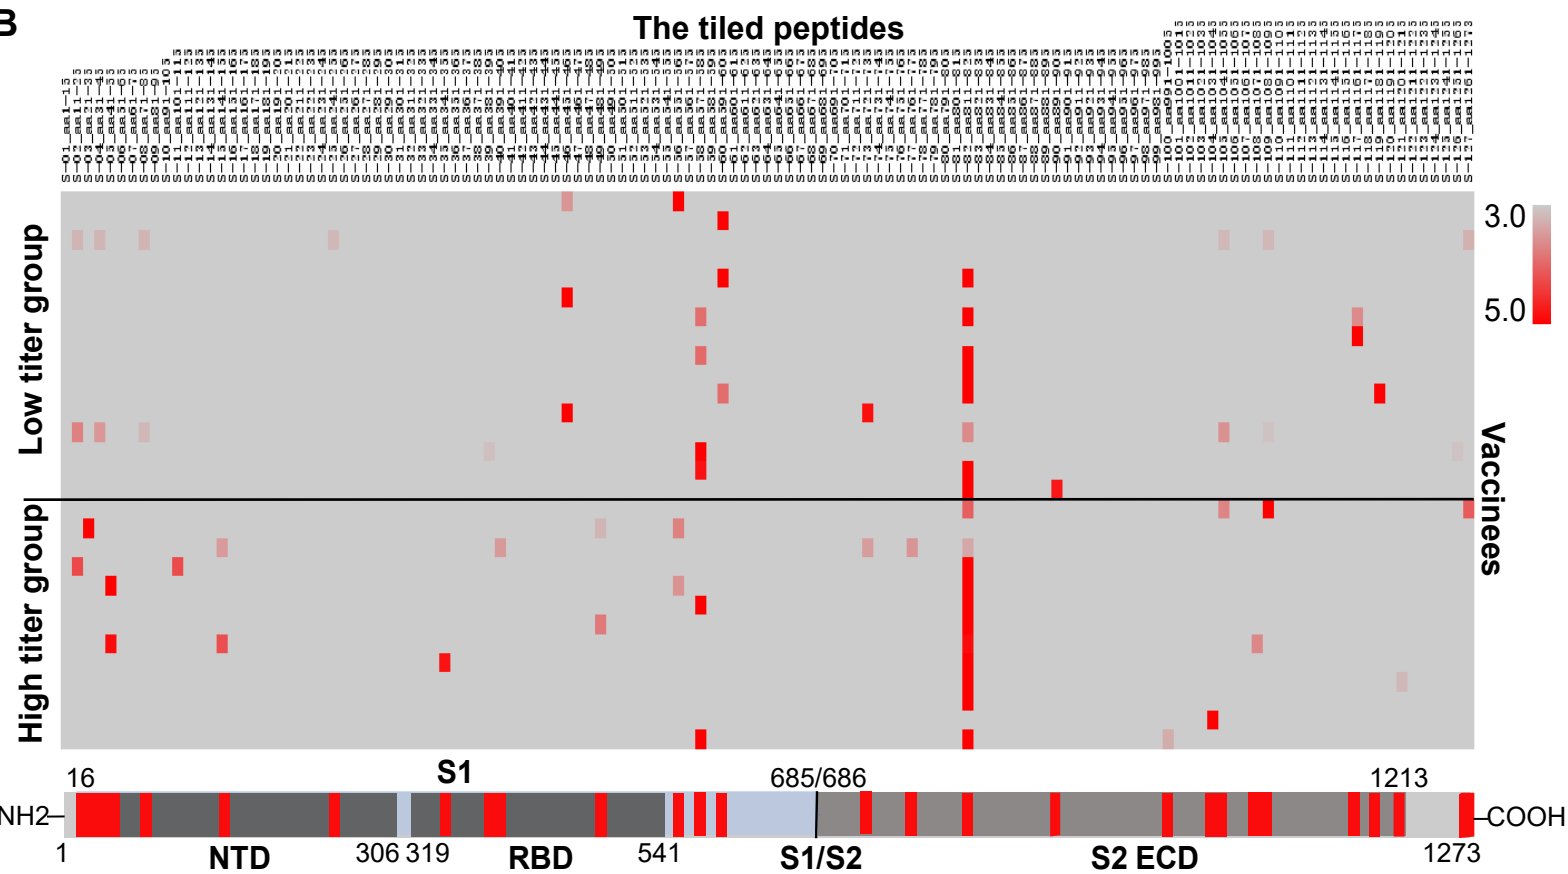**C**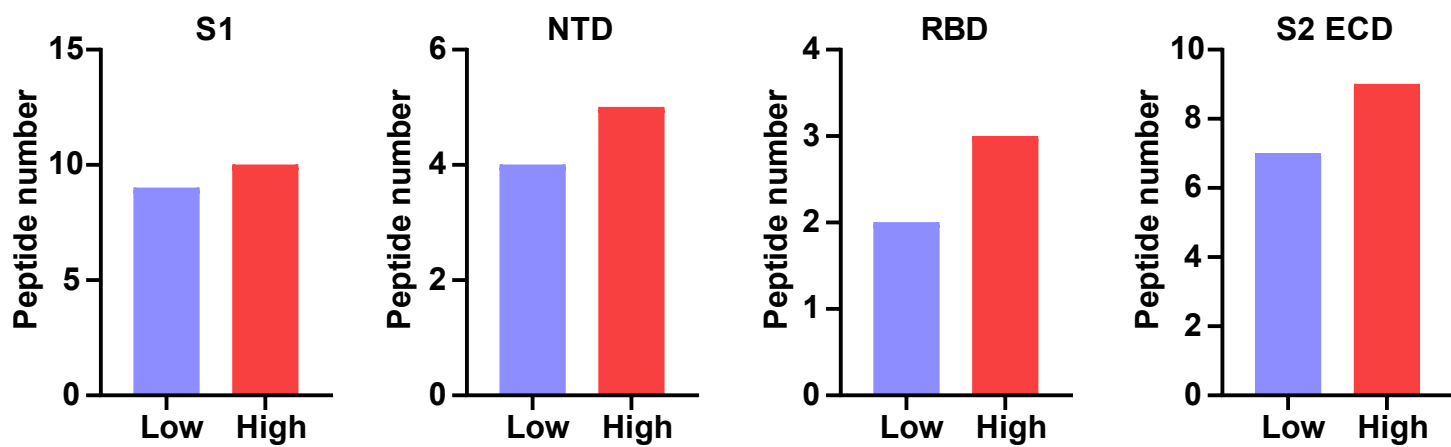

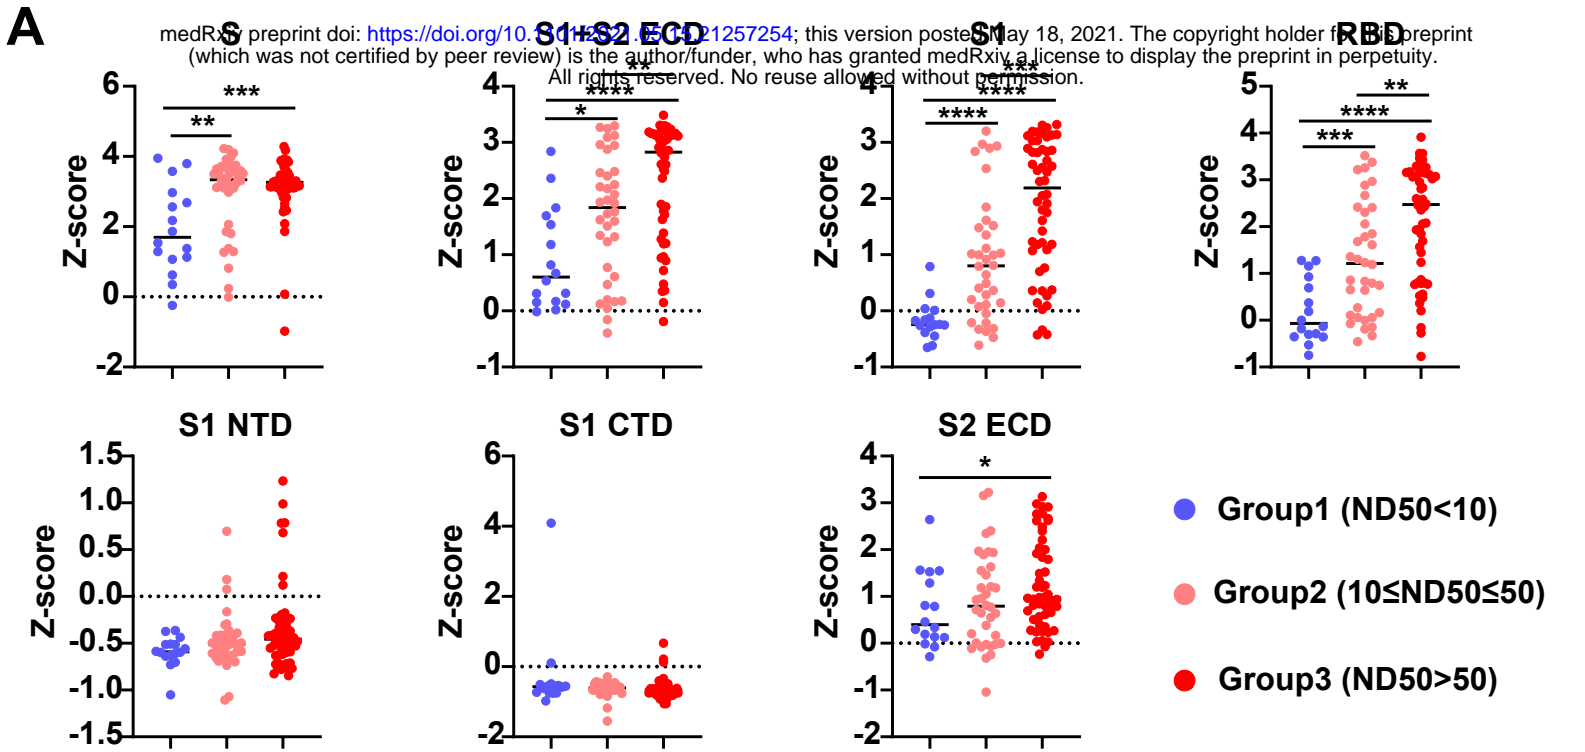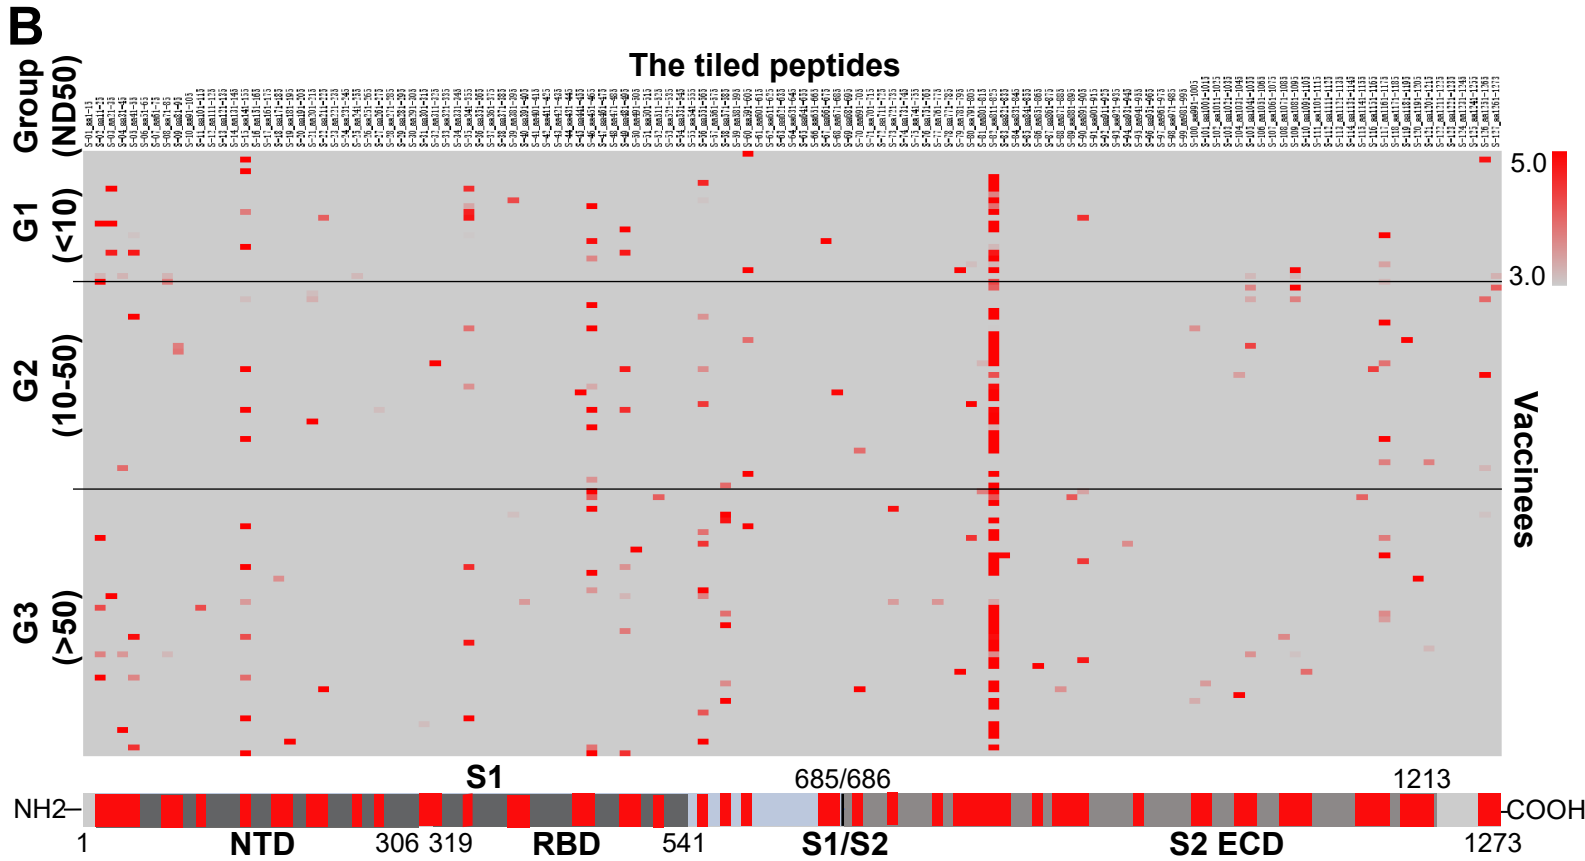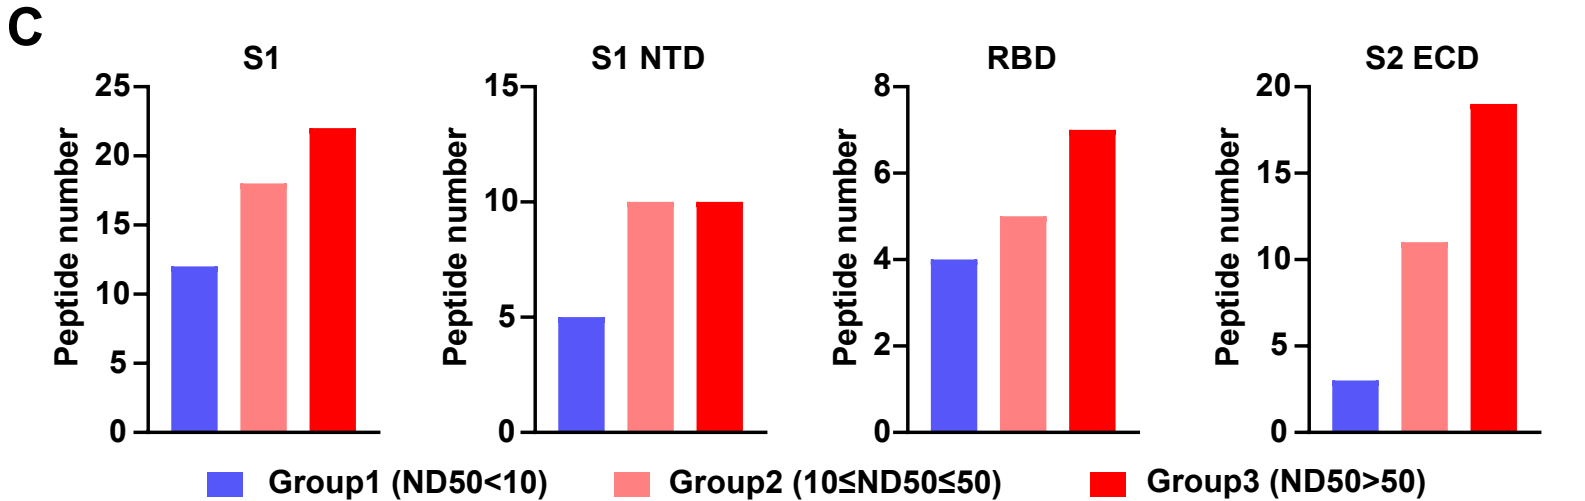

Source: https://medrxiv.org/content/medrxiv/early/2021/05/18/2021.05.15.21257254.full.pdf
